# Supplementary material
Source: PubMed Central journal article supplement (PMC3251239)
Supplement: supp_blood-2011-02-335430_Document1.pdf [file supp_blood-2011-02-335430_Document1.pdf]

## **Antibodies**

The following monoclonal antibodies were used for fluorescence activated cell sorting For immunoprecipitation and western blotting experiments, anti- $\beta 3$  integrin (N-20 and C-20, Santa Cruz Biotechnology, Santa Cruz, CA), anti-c-Src<sup>PY418</sup> (100F9, Cell Signaling Technology, Danvers, MA), Syk (N-19, Santa Cruz Biotechnology), anti-pTyr (PY99, Santa Cruz Biotechnology) and anti- $\beta 3$ <sup>PY747</sup> (Biosource International, Camarillo, CA) antibodies were used. Peroxidase-conjugated secondary antibody (GE healthcare science, Arlington Heights, IL) was used for western blotting.

## **Induction of outside-in signaling via integrin $\beta 3$ by anti-mouse $\beta 3$ integrin antibody, 2C9.G2, in platelets**

Washed platelets were prepared from C57/BL6 mice as described previously.<sup>1</sup> Platelets were incubated with 2C9.G2 or hamster IgG in Tyrode-Hepes buffer (137 mM NaCl, 12.1 mM NaHCO<sub>3</sub>, 2.7 mM KCl, 5 mM HEPES, BSA 0.1%, D-glucose 0.1%, 0.5 mM CaCl<sub>2</sub>, 1 mM MgCl<sub>2</sub>, pH7.4) for 15 min at room temperature. After incubation, the platelets lysed in lysis buffer (50 mM Tris-HCl (pH7.4), 150 mM NaCl, 1% Nonidet P-40, 0.5 mM EDTA, 0.1 mM PMSF, 10  $\mu$ g/ml Leupeptin and 10  $\mu$ g/ml aprotinin), and the lysates were subjected to immunoprecipitation with specific antibody and protein A or G Sepharose (Amersham Biosciences, Arlington Heights, IL) for 3 h at 4°C. Immunoprecipitated proteins were used for western blotting as described previously.<sup>1</sup>

## **Whole transcriptome analysis using a SOLiD system**

After sorting 1,000–1,500 CD34<sup>+</sup>KSL cells, total RNA was extracted as previously described,<sup>2</sup> and first strand cDNA were synthesized using a SMARTer Pico cDNA amplification kit (Clontech, Mountain View, CA). Double-stranded cDNA was then amplified by 20 cycles of PCR. The amplified cDNA was sheared into small fragments (80–130 bp) using a Covaris S2 system (Covaris, Inc., Woburn MA), which was followed by the repair and subsequent ligation of SOLiD P1 and P2 adaptors to the ends of target DNAs. To amplify a pool of cDNA fragments, the ligated fractions were subjected to limited rounds of PCR using primers complementary to the P1 and P2 adaptor sequences. After purification of the cDNA fragments, emulsion PCR was run using 1- $\mu$ m-diameter beads with P1 primers covalently attached to their surfaces. We then sequenced ~120,000,000 beads on a SOLiD sequencer (Applied Biosystems). All of these procedures were carried out according to the manufacturer's instructions. After SOLiD sequencing, we analyzed the raw data using Applied Biosystems' whole transcriptome software (<http://www.solidsoftwaretools.com/>). In addition, the expression signals were normalized by dividing the tag number of each gene by the total tag number. The whole transcriptomes obtained through SOLiD sequencing were analyzed using GeneSpring (Agilent Technologies). Following filtration based on  $p < 0.05$  and  $> 2$ -fold change, the selected genes were subjected to hierarchical cluster analysis. In addition, whole transcriptomes were subjected to gene set enrichment analysis using GSEA v2.06 software available from the Broad Institute (<http://www.broad.mit.edu/gsea>). Changed gene sets were selected based on a threshold set at a  $p$ -value  $< 0.05$  and FDR (q-value)  $< 0.25$ .

### **DNA microarray analysis**

After CD34<sup>-</sup>KSL cells were cultured with 2C9.G2 or control IgG for 5 days in S-Clone SF-03 medium supplemented with 50 ng/ml SCF and/or 50 ng/ml TPO, total RNA was extracted as described previously<sup>2</sup> from 5,000 sorted CD48<sup>-</sup>KSL cells, a population containing putative HSCs after culture.<sup>3</sup> Using the extracted total RNA, fluorescently-labeled cRNA was prepared with a ULS aRNA Fluorescent Labeling Kit (Kreatech, Amsterdam, The Netherlands), after which the cRNA was amplified using an Ovation<sup>TM</sup> Aminoallyl System (NuGEN Technologies, San Carlos, CA). The prepared cRNA was then hybridized into Whole Mouse Genome (4 × 44K) arrays (Agilent Technologies, Santa Clara, CA). After washing with a Gene Expression Wash Pack (Agilent Technologies), the microarrays were scanned using an Agilent MicroArray Scanner (Agilent Technologies). All of these procedures were carried out according to the manufacturer's instructions. The distribution of remaining average intensities for each chip was normalized to the quantile value for all chips, and the signal values for genes were normalized to the median value for all genes. The expression value (signal) and detection call (Present or Absent) for each probe set were calculated using Feature Extraction Ver.9.5.3 (Agilent Technologies). All experiments were performed in duplicate or triplicate using sorted cells that were independently prepared in separate experiments. To analyze the data, we first removed the probe sets that were used for quality control and consistently yielded high negative values, resulting in extraction of 35,791 genes. Additionally, all values less than 1 were set to 1 when addressing fold changes. To identify differentially expressed genes, we selected probe sets that showed more than a 1.4-fold upregulation or downregulation upon addition of 2C9.G2 to HSCs in the presence of TPO (Fig. S2). Genes from 2C9.G2-treated HSCs that showed more than a 1.0-fold upregulation or downregulation only in the presence of SCF were filtered out of the selected probe sets so as to clearly identify the effects of the combination of TPO and outside-in signaling from β3 integrin (Fig. S2). Gene ontology analysis was performed using Onto-Express on the Onto-tools website (<http://vortex.cs.wayne.edu/projects.htm>).

### **Single cell culture**

Single CD34<sup>-</sup>KSL cells were clonally sorted into the wells of 96-well U bottom plates (BD falcon, Franklin Lakes, NJ) and cultured with 2C9.G2 or hamster IgG for 5 days in the indicated medium. After 5 days, the total cell number was counted in the individual wells using a phase-contrast microscope.

### **BrdU uptake assay**

To determine cell cycle rates *in vivo*, BrdU (100 mg/kg; BD Biosciences) was intraperitoneally injected into Wt and Y747A mice. Two hours after administration, the % BrdU<sup>+</sup> cells were determined in individual mice using a BrdU Flow Kit (BD Biosciences). Following the manufacturer's instructions, whole BMCs were stained with antibodies to detect CD34<sup>-</sup>KSL or CD34<sup>+</sup>KSL cells, and were examined individually. The cells were treated with DNase I for 1 h at 37°C, stained with anti-BrdU antibody (BD Biosciences) and assayed using flow cytometry.

## REFERENCES

1. Takizawa H, Nishimura S, Takayama N, et al. Lnk regulates integrin alphaIIb beta3 outside-in signaling in mouse platelets, leading to stabilization of thrombus development *in vivo*. *J Clin Invest*. 2010;120(1):179–190. Prepublished on 2009/12/30 as DOI 39503 [pii] 10.1172/JCI39503.
2. Umemoto T, Yamato M, Nishida K, Yang J, Tano Y, Okano T. Limbal epithelial side-population cells have stem cell-like properties, including quiescent state. *Stem Cells*. 2006;24(1):86–94. Prepublished on 2005/09/10 as DOI 2005-0064 [pii] 10.1634/stemcells.2005-0064.
3. Noda S, Horiguchi K, Ichikawa H, Miyoshi H. Repopulating activity of *ex vivo*-expanded murine hematopoietic stem cells resides in the CD48–c-Kit+Sca-1+lineage marker– cell population. *Stem Cells*. 2008;26(3):646–655. Prepublished on 2007/12/15 as DOI 2007-0623 [pii] 10.1634/stemcells.2007-0623.

### Table S1. Gene sets upregulated in Wt CD34<sup>-</sup>KSL cells, as compared to Y747A cells

The whole transcriptomes of wild-type and Y747A HSCs were subjected to gene set enrichment analysis (GSEA), and the threshold was set at p-value <0.05 and FDR (q value) <0.25. The normalized enrichment score (NES) reflects the degree to which a gene set is overrepresented at the top or bottom of a ranked list of genes. Bold indicates the gene sets in which p<0.01 and q<0.1.

| NAME                                   | DISTRIBUTION                                                                                                                                                                                                                        | NES             | NOM p-val        | FDR q-val       |
|----------------------------------------|-------------------------------------------------------------------------------------------------------------------------------------------------------------------------------------------------------------------------------------|-----------------|------------------|-----------------|
| DORSAM_HOXA9_UP                        | Genes upregulated by HOXA9                                                                                                                                                                                                          | <b>3.780879</b> | <b>&lt;0.001</b> | <b>0.089415</b> |
| CMV_HCMV_TIMECOURSE_4HRS_DN            | Down-regulated in fibroblasts following infection with human cytomegalovirus with maximum change at 4 hours                                                                                                                         | <b>3.622293</b> | <b>&lt;0.001</b> | <b>0.081843</b> |
| DER_IFNG_UP                            | Genes up-regulated by interferon-gamma in HT1080 (fibrosarcoma)                                                                                                                                                                     | <b>3.5233</b>   | <b>&lt;0.001</b> | <b>0.071108</b> |
| UVC_XPCS_4HR_DN                        | Down-regulated at 4 hours following treatment of XPB/CS fibroblasts with 3 J/m <sup>2</sup> UVC                                                                                                                                     | <b>3.428252</b> | <b>&lt;0.001</b> | <b>0.090449</b> |
| CALCINEURIN_NF_AT_SIGNALING            | Mouse genes associated with signal transduction through calcium, calcineurin, and NF-AT.                                                                                                                                            | <b>3.340477</b> | <b>&lt;0.001</b> | <b>0.088111</b> |
| IFN_ANY_UP                             | Upregulated 2-fold in HT1080 cells 6 hours following treatment with any of interferons alpha, beta and gamma                                                                                                                        | <b>3.280988</b> | <b>&lt;0.001</b> | <b>0.08798</b>  |
| DER_IFNB_UP                            | Genes up-regulated by interferon-beta in HT1080 (fibrosarcoma)                                                                                                                                                                      | <b>3.220002</b> | <b>&lt;0.001</b> | <b>0.097217</b> |
| IFN_GAMMA_UP                           | Upregulated 2-fold in HT1080 cells 6 hours following treatment with interferon gamma                                                                                                                                                | <b>3.146951</b> | <b>&lt;0.001</b> | <b>0.113284</b> |
| LEI_MYB_REGULATED_GENES                | Myb-regulated genes                                                                                                                                                                                                                 | <b>3.063134</b> | <b>&lt;0.001</b> | <b>0.106041</b> |
| UV-CMV_UNIQUE_HCMV_6HRS_UP             | Up-regulated in fibroblasts at 6 hours following infection with UV-inactivated CMV, but not untreated CMV                                                                                                                           | <b>2.937503</b> | <b>&lt;0.001</b> | <b>0.113874</b> |
| CMV-UV_HCMV_6HRS_UP                    | Up-regulated in fibroblasts at 6 hours following infection with UV-inactivated human cytomegalovirus                                                                                                                                | <b>2.936515</b> | <b>&lt;0.001</b> | <b>0.105794</b> |
| IFN_ALPHA_UP                           | Upregulated 2-fold in HT1080 cells 6 hours following treatment with interferon alpha                                                                                                                                                | <b>2.93507</b>  | <b>&lt;0.001</b> | <b>0.099061</b> |
| UVB_NHEK1_C1                           | Upregulated by UV-B light in normal human epidermal keratinocytes, cluster 1                                                                                                                                                        | <b>2.918387</b> | <b>&lt;0.001</b> | <b>0.097381</b> |
| CMV_HCMV_TIMECOURSE_ALL_UP             | Up-regulated in fibroblasts following infection with human cytomegalovirus.                                                                                                                                                         | <b>2.849963</b> | <b>&lt;0.001</b> | <b>0.105456</b> |
| IL6PATHWAY                             | IL-6 binding to its receptor activates JAK kinases and a variety of transcription factors, with effects in neuronal differentiation, bone loss, and inflammation.                                                                   | <b>2.764113</b> | <b>&lt;0.001</b> | <b>0.129641</b> |
| FCER1PATHWAY                           | In mast cells, Fc epsilon receptor 1 activates BTK, PKC, and the MAP kinase pathway to promote degranulation and arachnidonic acid release                                                                                          | <b>2.759928</b> | <b>&lt;0.001</b> | <b>0.123101</b> |
| PENG_LEUCINE_UP                        | Genes upregulated in response to leucine starvation                                                                                                                                                                                 | <b>2.756302</b> | <b>&lt;0.001</b> | <b>0.119043</b> |
| CMV_8HRS_UP                            | Upregulated at 8hrs following infection of primary human foreskin fibroblasts with CMV                                                                                                                                              | <b>2.710537</b> | <b>0.037209</b>  | <b>0.125483</b> |
| IFN_BETA_UP                            | Upregulated 2-fold in HT1080 cells 6 hours following treatment with interferon beta                                                                                                                                                 | <b>2.67786</b>  | <b>&lt;0.001</b> | <b>0.130361</b> |
| SMOOTH_MUSCLE_CONTRACTION              |                                                                                                                                                                                                                                     | <b>2.657845</b> | <b>&lt;0.001</b> | <b>0.132751</b> |
| PRMT5_KD_DN                            | Down-regulated by stable RNAi knock-down of PRMT5 in NIH 3T3 cells                                                                                                                                                                  | <b>2.642075</b> | <b>&lt;0.001</b> | <b>0.135555</b> |
| P53GENES_ALL                           | p53 transcriptional targets                                                                                                                                                                                                         | <b>2.640601</b> | <b>&lt;0.001</b> | <b>0.132046</b> |
| IFN_ALL_UP                             | Upregulated 2-fold in HT1080 cells 6 hours following treatment with interferons alpha, beta and gamma                                                                                                                               | <b>2.61445</b>  | <b>&lt;0.001</b> | <b>0.141137</b> |
| ST_FAS_SIGNALING_PATHWAY               | The Fas receptor induces apoptosis and NF-kB activation when bound to Fas ligand.                                                                                                                                                   | <b>2.602091</b> | <b>&lt;0.001</b> | <b>0.13878</b>  |
| CMV_HCMV_TIMECOURSE_12HRS_UP           | Up-regulated in fibroblasts following infection with human cytomegalovirus (at least 3-fold, with Affymetrix change call, in at least two consecutive timepoints), with maximum change at 12 hours                                  | <b>2.589036</b> | <b>&lt;0.001</b> | <b>0.142917</b> |
| HSA04620_TOLL_LIKE_RECEPTOR_SIGNALING  | Genes involved in Toll-like receptor signaling pathway                                                                                                                                                                              | <b>2.588033</b> | <b>&lt;0.001</b> | <b>0.138382</b> |
| CMV_ALL_UP                             | Upregulated at any timepoint following infection of primary human foreskin fibroblasts with CMV                                                                                                                                     | <b>2.582003</b> | <b>&lt;0.001</b> | <b>0.135179</b> |
| SHEPARD_CELL_PROLIFERATION             | Cell proliferation genes determined in zebra fish                                                                                                                                                                                   | <b>2.566925</b> | <b>&lt;0.001</b> | <b>0.135996</b> |
| CELL_PROLIFERATION                     | The multiplication or reproduction of cells, resulting in the rapid expansion of a cell population.                                                                                                                                 | <b>2.566925</b> | <b>&lt;0.001</b> | <b>0.140853</b> |
| HSA05030_AMYOTROPHIC_LATERAL_SCLEROSIS | Genes involved in amyotrophic lateral sclerosis (ALS)                                                                                                                                                                               | <b>2.559734</b> | <b>&lt;0.001</b> | <b>0.135745</b> |
| BRG1_SWI3_UP                           | Up-regulated by transient expression of BRG1 at 24 hours in human, BRG1-lacking SW-13 cells                                                                                                                                         | <b>2.552981</b> | <b>&lt;0.001</b> | <b>0.135817</b> |
| DER_IFNA_UP                            | Genes up-regulated by interferon-alpha in HT1080 (fibrosarcoma)                                                                                                                                                                     | <b>2.552463</b> | <b>&lt;0.001</b> | <b>0.132354</b> |
| EPOPATHWAY                             | Erythropoietin, which activates the MAPK pathway, stimulates erythrocyte production and is an effective treatment for anemia.                                                                                                       | <b>2.528966</b> | <b>&lt;0.001</b> | <b>0.136674</b> |
| BREAST_CANCER_ESTROGEN_SIGNALING       | Genes preferentially expressed in breast cancers, especially those involved in estrogen-receptor-dependent signal transduction.                                                                                                     | <b>2.517045</b> | <b>&lt;0.001</b> | <b>0.137332</b> |
| SHEPARD_POS_REG_OF_CELL_PROLIFERATION  | Positive regulators of cell proliferation in zebra fish                                                                                                                                                                             | <b>2.484177</b> | <b>0.037209</b>  | <b>0.143191</b> |
| IDX_TSA_UP_CLUSTER1                    | Strongly up-regulated at 2 hours during differentiation of 3T3-L1 fibroblasts into adipocytes with IDX (insulin, dexamethasone and isobutylxanthine), vs. fibroblasts treated with IDX + TSA to prevent differentiation (cluster 1) | <b>2.482752</b> | <b>&lt;0.001</b> | <b>0.139908</b> |
| ET743_HELA_UP                          | Upregulated by Et-743 in HeLa cells                                                                                                                                                                                                 | <b>2.428596</b> | <b>&lt;0.001</b> | <b>0.156943</b> |
| UVC_XPCS_ALL_DN                        | Down-regulated at any timepoint following treatment of XPB/CS fibroblasts with 3 J/m <sup>2</sup> UVC                                                                                                                               | <b>2.402065</b> | <b>0.029805</b>  | <b>0.164906</b> |
| UVB_NHEK4_24HRS_DN                     | Downregulated at 24 hours by UV-B light in normal human epidermal keratinocytes                                                                                                                                                     | <b>2.379913</b> | <b>&lt;0.001</b> | <b>0.174079</b> |
| TAKEDA_NUP98_HOXA9_8D_UP               | Effect of NUP98-HOXA9 on gene transcription at 8 d after transduction UP                                                                                                                                                            | <b>2.374681</b> | <b>0.033708</b>  | <b>0.17208</b>  |
| LEE_MYC_E2F1_DN                        | Genes down-regulated in hepatoma tissue of Myc+E2F1 transgenic mice                                                                                                                                                                 | <b>2.372752</b> | <b>&lt;0.001</b> | <b>0.169055</b> |

|                                           |                                                                                                                                                                                                                                         |          |          |          |
|-------------------------------------------|-----------------------------------------------------------------------------------------------------------------------------------------------------------------------------------------------------------------------------------------|----------|----------|----------|
| KERATINOCYTEPATHWAY                       | Keratinocyte differentiation, which models the differentiation of epidermal cells, requires the four main MAP kinase pathways.                                                                                                          | 2.368144 | <0.001   | 0.166451 |
| TENEDINI_MEGAKARYOCYTIC_GENES             | Genes essential to the development of megakaryocytes, as expressed in normal cells and essential thrombocythemias (ET).                                                                                                                 | 2.360362 | <0.001   | 0.167838 |
| HYPOXIA_REVIEW                            | Genes known to be induced by hypoxia                                                                                                                                                                                                    | 2.33619  | 0.025532 | 0.171136 |
| RETT_UP                                   | Upregulated by expression of mutant MeCP2 (Rett syndrome) vs. wt MeCP2 in fibroblasts                                                                                                                                                   | 2.331012 | <0.001   | 0.170931 |
| RADIATION_SENSITIVITY                     | Genes related to radiation sensitivity                                                                                                                                                                                                  | 2.325312 | <0.001   | 0.16485  |
| UVB_SCC_UP                                | Upregulated by UV-B light in squamous cell carcinoma cells                                                                                                                                                                              | 2.322484 | 0.029021 | 0.163126 |
| CROONQUIST_RAS_STROMA_DN                  | Genes downregulated in multiple myeloma cells with N-ras-activating mutations versus those co-cultured with bone marrow stromal cells.                                                                                                  | 2.282837 | <0.001   | 0.171753 |
| HDACI_COLON_BUT48HRS_UP                   | Upregulated by butyrate at 48 hrs in SW260 colon carcinoma cells                                                                                                                                                                        | 2.259198 | <0.001   | 0.17668  |
| PENG_RAPAMYCIN_UP                         | Genes upregulated in response to rapamycin starvation                                                                                                                                                                                   | 2.255989 | <0.001   | 0.175487 |
| ZUCCHI_EPITHELIAL_DN                      | The 50 most downregulated genes in primary invasive breast ductal carcinoma or metastatic breast carcinoma isolated from lymph nodes, as compared to normal mammary epithelium.                                                         | 2.254453 | <0.001   | 0.1727   |
| AD12_ANY_DN                               | Down-regulated 2-fold in HeLa cells by Adenovirus type 12 (Ad12) at any timepoint to 48 hrs hours post-infection                                                                                                                        | 2.229415 | <0.001   | 0.18221  |
| PASSERINI_PROLIFERATION                   | Genes associated with cellular adhesion that are differentially expressed in endothelial cells of pig aortas from regions of disturbed flow (inner aortic arch) versus regions of undisturbed laminar flow (descending thoracic aorta). | 2.226453 | 0.046065 | 0.180443 |
| CHESSLER_HIGHEST_FOLD_RANGE_GENES         | 50 neurologically relevant transcripts with highest abundance fold range among strains                                                                                                                                                  | 2.215944 | <0.001   | 0.18084  |
| LINDSTEDT_DEND_8H_VS_48H_UP               | Genes up-regulated in DC stimulated for 8 h as compared to DC stimulated for 48 h                                                                                                                                                       | 2.21318  | <0.001   | 0.176045 |
| GPCRDB_OTHER                              |                                                                                                                                                                                                                                         | 2.210764 | <0.001   | 0.174622 |
| TAKEDA_NUP98_HOXA9_10D_DN                 | Effect of NUP98-HOXA9 on gene transcription at 10 d after transduction Down                                                                                                                                                             | 2.210015 | <0.001   | 0.173292 |
| AS3_FIBRO_C4                              | Downregulated early by sodium arsenite in fibroblasts (Cluster 4)                                                                                                                                                                       | 2.185448 | <0.001   | 0.179709 |
| CALRES_MOUSE_NEOCORTEX_DN                 | Downregulated in the neocortex of aged (30-month) mice subjected to caloric restriction since young adulthood vs. age-matched controls                                                                                                  | 2.184738 | 0.045614 | 0.177814 |
| AD12_24HRS_DN                             | Down-regulated 2-fold in HeLa cells by Adenovirus type 12 (Ad12) at 24 hours post-infection                                                                                                                                             | 2.181267 | <0.001   | 0.17647  |
| HS04630_JAK_STAT_SIGNALING_PATHWAY        | Genes involved in Jak-STAT signaling pathway                                                                                                                                                                                            | 2.175542 | 0.039735 | 0.173542 |
| ADIP_HUMAN_UP                             | Up-regulated in primary human adipocytes, versus preadipocytes                                                                                                                                                                          | 2.171569 | <0.001   | 0.173222 |
| STRESS_GENOTOXIC_SPECIFIC_UP              | Genes up-regulated 4 hours following genotoxic stress that discriminate genotoxic from non-genotoxic stress                                                                                                                             | 2.142541 | <0.001   | 0.178715 |
| VERHAAK_AML_NPM1_MUT_VS_WT_UP             | Genes that are upregulated in AML NPM1 mutant versus AML NPM1 wild type                                                                                                                                                                 | 2.135005 | 0.029    | 0.178908 |
| HS04662_B_CELL_RECEPTOR_SIGNALING_PATHWAY | Genes involved in B cell receptor signaling pathway                                                                                                                                                                                     | 2.132378 | <0.001   | 0.177542 |
| HOGERKORP_ANTI_CD44_UP                    | Genes differentially expressed in human B cells cultured in vitro in the presence or absence of CD44 ligation, together with anti-immunoglobulin and anti-CD40 antibodies                                                               | 2.091393 | <0.001   | 0.196495 |
| HDACI_COLON_BUT_UP                        | Upregulated by butyrate at any timepoint up to 48 hrs in SW260 colon carcinoma cells                                                                                                                                                    | 2.066219 | 0.029668 | 0.200895 |
| DRUG_RESISTANCE_AND_METABOLISM            | Genes implicated in drug resistance and metabolism                                                                                                                                                                                      | 2.028933 | <0.001   | 0.202889 |
| ETS_PATHWAY                               | The Ets transcription factors are activated by Ras and promote macrophage differentiation.                                                                                                                                              | 2.015379 | <0.001   | 0.199783 |
| UVB_NHEK4_6HRS_DN                         | Downregulated at 6 hours by UV-B light in normal human epidermal keratinocytes                                                                                                                                                          | 2.012101 | <0.001   | 0.201071 |
| CALRES_RHESUS_DN                          | Downregulated in the vastus lateralis muscle of middle-aged rhesus monkeys subjected to caloric restriction since young adulthood vs. age-matched controls                                                                              | 2.009319 | 0.034    | 0.198104 |
| HS04512_PANCREATIC_CANCER                 | Genes involved in pancreatic cancer                                                                                                                                                                                                     | 1.978935 | <0.001   | 0.20815  |
| BRCA1_HESUP                               | Genes with reduced expression in mouse embryonic stem cells with a targeted deletion of BRCA1, whose expression was rescued by ectopic expression of a BRCA1 transgene                                                                  | 1.976375 | <0.001   | 0.206089 |
| ITDPATHWAY                                | On ligand binding, interferon gamma receptors stimulate JAK2 kinase to phosphorylate STAT transcription factors, which promote expression of interferon responsive genes.                                                               | 1.966672 | <0.001   | 0.206645 |
| ST_ADRENERGIC                             | Adrenergic receptors respond to epinephrine and norepinephrine signaling.                                                                                                                                                               | 1.938831 | <0.001   | 0.213494 |
| AT1R_PATHWAY                              | Binding of angiotensin II to AT1-R activates Ca2+ signaling and the JNK pathway.                                                                                                                                                        | 1.934715 | <0.001   | 0.213267 |
| EGF_PATHWAY                               | The epidermal growth factor (EGF) peptide stimulates the EGF receptor to promote cell proliferation via the MAP kinase and Ras pathways.                                                                                                | 1.930149 | <0.001   | 0.217076 |
| BAF57_BT549_DN                            | Down-regulated following stable re-expression of BAF57 in Bt549 breast cancer cells that lack functional BAF57                                                                                                                          | 1.926494 | 0.032694 | 0.217489 |
| AGED_RHESUS_DN                            | Downregulated in the vastus lateralis muscle of aged vs. young adult rhesus monkeys                                                                                                                                                     | 1.924703 | <0.001   | 0.216343 |
| SHEPARD_NEG_REG_OF_CELL_PROLIFERATION     | Negative regulators of cell proliferation in zebra fish                                                                                                                                                                                 | 1.902596 | <0.001   | 0.224367 |
| CMV_HCMV_TIMECOURSE_48HRS_DN              | Down-regulated in fibroblasts following infection with human cytomegalovirus (at least 3-fold, with Affymetrix change call, in at least two consecutive timepoints), with maximum change at 48 hours                                    | 1.89314  | <0.001   | 0.227611 |
| BCR_PATHWAY                               | B cell antigen receptors (BCRs) activate tyrosine kinases and transiently increase tyrosine phosphorylation on binding to antigen.                                                                                                      | 1.889467 | <0.001   | 0.229058 |
| CHANG_SERUM_RESPONSE_UP                   | CSR (Serum Response) signature for activated genes (Stanford)                                                                                                                                                                           | 1.879769 | 0.024641 | 0.234862 |
| GH_EXOGENOUS_ANY_DN                       | Down-regulated at any time point (1-24 hours) following treatment of mammary carcinoma cells (MCF-7) with exogenous human growth hormone                                                                                                | 1.876963 | <0.001   | 0.234946 |
| GH_EXOGENOUS_LATE_DN                      | Down-regulated at late time points (12-24 hours) following treatment of mammary carcinoma cells (MCF-7) with exogenous human growth hormone                                                                                             | 1.872325 | 0.024845 | 0.237313 |
| PASSERINI_SIGNAL                          | Genes associated with cellular adhesion that are differentially expressed in endothelial cells of pig aortas from regions of disturbed flow (inner aortic arch) versus regions of undisturbed laminar flow (descending thoracic aorta). | 1.866323 | <0.001   | 0.239453 |
| GPCR_PATHWAY                              | G-protein coupled receptors activate adenylyl cyclase, which converts ATP to cAMP, to activate second messenger pathways.                                                                                                               | 1.864519 | <0.001   | 0.236562 |
| HS04640_HEMATOPOIETIC_CELL_LINEAGE        | Genes involved in hematopoietic cell lineage                                                                                                                                                                                            | 1.862582 | <0.001   | 0.235519 |
| INNEREAR_UP                               | Genes preferentially expressed in human inner ear tissue (cochlea and vestibule), at least 10-fold higher from a mixture of 29 other tissues                                                                                            | 1.859108 | <0.001   | 0.233708 |
| ZHAN_MMP3_PC                              | Microarray-derived expression levels of genes differentially expressed during PC development                                                                                                                                            | 1.854972 | <0.001   | 0.233645 |
| MCALPAIN_PATHWAY                          | In integrin-mediated cell migration, calpains digest links between the actin cytoskeleton and focal adhesion proteins.                                                                                                                  | 1.853146 | 0.048485 | 0.232181 |
| RUIZ_TENASCIN_TARGETS                     | Tenascin-C target genes                                                                                                                                                                                                                 | 1.84324  | 0.045455 | 0.236185 |
| IL2_PATHWAY                               | IL-2 promotes proliferation via JAK and MAP kinase and has surface receptors on activated B cells, LPS-treated monocytes, and many T cells.                                                                                             | 1.837445 | 0.033    | 0.233956 |
| CROONQUIST_IL6_STROMA_UP                  | Genes upregulated in multiple myeloma cells exposed to the pro-proliferative cytokine IL-6 versus those co-cultured with bone marrow stromal cells.                                                                                     | 1.837135 | <0.001   | 0.230678 |
| IL1R_PATHWAY                              | The cytokine IL-1 stimulates its primary receptor, IL-1R1, which induces transcription of inflammation-related genes such as interferons.                                                                                               | 1.835865 | <0.001   | 0.229229 |
| SIG_BCR_SIGNALING_PATHWAY                 | Members of the BCR signaling pathway                                                                                                                                                                                                    | 1.832386 | <0.001   | 0.229483 |
| CREB_BRAIN_2WKS_UP                        | Up-regulated in the nucleus accumbens of mice after 2 weeks of induction of transgenic CREB                                                                                                                                             | 1.813879 | <0.001   | 0.235339 |
| PARK_MSCS_DIFF                            | List of differentially expressed genes between RhoLin2/loSca-11c-kit1 and RhiLin2/loSca-11c-kit1 HSCs                                                                                                                                   | 1.807054 | <0.001   | 0.237005 |
| CELL_CYCLE_KEGG                           |                                                                                                                                                                                                                                         | 1.795203 | 0.024    | 0.24449  |
| CMV_HCMV_TIMECOURSE_18HRS_DN              | Down-regulated in fibroblasts following infection with human cytomegalovirus (at least 3-fold, with Affymetrix change call, in at least two consecutive timepoints), with maximum change at 18 hours                                    | 1.791109 | <0.001   | 0.244867 |
| NEMETH_TNF_DN                             | Genes down-regulated after 3 h in LPS-stimulated RAW 2647 macrophages                                                                                                                                                                   | 1.786664 | <0.001   | 0.245376 |
| CARIES_PULP_UP                            | Up-regulated in pulp tissue from extracted carious teeth (cavities), compared to tissue from extracted healthy teeth                                                                                                                    | 1.775764 | 0.029835 | 0.248961 |

|                   | Fresh         | Culture for 5 days<br>with SCF + TPO |               |
|-------------------|---------------|--------------------------------------|---------------|
|                   |               | IgG                                  | 2C9.G2        |
| Total cell number | 40            | 4498 ± 1254                          | 4360 ± 1169   |
| HSC frequency     | 1 in 3.5      | 1 in 43.2                            | 1 in 90.2     |
| No. of HSCs       | 11.4          | 104.2                                | 48.2          |
| RU                | 1.115 ± 0.489 | 3.652 ± 1.433                        | 5.732 ± 2.330 |

**Table S2. Integrin  $\beta 3$ -mediated signaling contributes to successful *ex vivo* expansion of HSCs without loss of LTR activity per single HSC**

The results obtained with single-cell transplantation were used to determine HSC frequency among fresh CD34<sup>+</sup>KSL cells (Fig. 5D). HSC numbers were calculated from the total cell number and HSC frequency. Repopulation unit (RU) values reflect that ability in HSCs (see Materials and Methods).

**Table S3. Genes upregulated in 2C9.G2-treated HSCs cultured in the presence of TPO**

The values are the fold changes in 2C9.G2-treated vs. IgG-treated cells under the indicated conditions. A and P represent the detection calls “Absence” and “Presence,” respectively.

| ProbeName     | Description                                                                                                                                                                                              | GenbankAccession | GeneSymbol   | Fold change |        |
|---------------|----------------------------------------------------------------------------------------------------------------------------------------------------------------------------------------------------------|------------------|--------------|-------------|--------|
|               |                                                                                                                                                                                                          |                  |              | SCF + TPO   | TPO    |
| A_51_P406401  | Mus musculus 4 days neonate male adipose cDNA, RIKEN full-length enriched library, clone B430311007 product unclassifiable, full insert sequence. [AK046685]                                             | AK046685         | Pan3         | 8.753       | 5.542  |
| A_52_P366385  | Mus musculus ring finger protein 123 (Rnf123), mRNA [NM_032543]                                                                                                                                          | NM_032543        | Rnf123       | 6.212       | 2.837  |
| A_52_P235108  | Mus musculus vacuolar protein sorting 35 (Vps35), mRNA [NM_022997]                                                                                                                                       | NM_022997        | Vps35        | 4.443       | 1.587  |
| A_51_P169401  | Mus musculus low density lipoprotein receptor-related protein 6 (Lrp6), mRNA [NM_008514]                                                                                                                 | NM_008514        | Lrp6         | 4.005       | 2.997  |
| A_52_P1083668 | Mus musculus 16 days neonate thymus cDNA, RIKEN full-length enriched library, clone A130020M21 product unclassifiable, full insert sequence. [AK037475]                                                  | AK037475         | AK037475     | 3.733       | 2.467  |
| A_51_P498388  | Mus musculus SH3-binding kinase 1 (Sbk1), mRNA [NM_145587]                                                                                                                                               | NM_145587        | Sbk1         | 3.679       | 3.412  |
| A_51_P1212525 | Mus musculus mitochondrial ribosomal protein S25 (Mrps25), mRNA [NM_025578]                                                                                                                              | NM_025578        | Mrps25       | 3.677       | 4.170  |
| A_52_P138267  | Mus musculus adult male corpora quadrigemina cDNA, RIKEN full-length enriched library, clone B230337F23 product nucleobindin, full insert sequence. [AK080831]                                           | AK080831         | Nucb1        | 3.649       | 1.896  |
| A_52_P52311   | AF052147 cul-3 (Homo sapiens) (exp=-1; wgp=0; cg=0), partial (27%) [TC1620610]                                                                                                                           | TC1620610        | TC1620610    | 3.374       | 2.441  |
| A_52_P563123  | Mus musculus tropomyosin, cardiac (Tnn3), mRNA [NM_009406]                                                                                                                                               | NM_009406        | Tnn3         | 3.350       | 3.177  |
| A_52_P131972  | PREDICTED: Mus musculus membrane associated DNA binding protein, transcript variant 5 (Mnab), mRNA [XM_901554]                                                                                           | XM_901554        | Rcbp3        | 3.338       | 1.575  |
| A_52_P589930  | Mus musculus 16 days neonate thymus cDNA, RIKEN full-length enriched library, clone A130095P21 product CYTOSOLIC IMP-GMP SPECIFIC 5'-NUCLEOTIDASE homolog (Bos taurus), full insert sequence. [AK038326] | AK038326         | Nfs2c2       | 3.317       | 4.011  |
| A_51_P248304  | Mus musculus vacuolar protein sorting 26 homolog B (yeast) (Vps26b), mRNA [NM_178027]                                                                                                                    | NM_178027        | Vps26b       | 3.295       | 1.429  |
| A_52_P213361  | Mus musculus inositol polyphosphate-5-phosphatase F (Inpp5f), mRNA [NM_178641]                                                                                                                           | NM_178641        | inpp5f       | 3.245       | 3.444  |
| A_52_P567652  | Mus musculus 2 days pregnant adult female oviduct cDNA, RIKEN full-length enriched library, clone E230012B12 product unclassifiable, full insert sequence. [AK087575]                                    | AK087575         | AK087575     | 3.232       | 2.406  |
| A_52_P472583  | Mus musculus ribosome binding protein 1 (Rbtp1), transcript variant 2, mRNA [NM_133626]                                                                                                                  | NM_133626        | Rbtp1        | 3.115       | 2.046  |
| A_51_P273378  | Mus musculus 16 days neonate cerebellum cDNA, RIKEN full-length enriched library, clone 9630001N18 product unclassifiable, full insert sequence [AK137301]                                               | AK137301         | Apc          | 3.033       | 1.884  |
| A_52_P318683  | Mus musculus UPR2 regulator of nonsense transcripts homolog (yeast) (Upr2), mRNA [NM_001081132]                                                                                                          | NM_001081132     | Upr2         | 3.015       | 3.062  |
| A_52_P6328    | Mus musculus iron-5-cell colony-enhancing factor 1 (Pbaf1), mRNA [NM_021524]                                                                                                                             | NM_021524        | Pbaf1        | 2.857       | 3.641  |
| A_52_P246716  | Mus musculus adult male corpora quadrigemina cDNA, RIKEN full-length enriched library, clone B230325K18 product hypothetical protein, full insert sequence [AK080825]                                    | AK080825         | B230325K18R1 | 2.862       | 4.100  |
| A_52_P81101   | Mus musculus inositol polyphosphate multikinase (ipmk), mRNA [NM_027184]                                                                                                                                 | NM_027184        | ipmk         | 2.841       | 1.590  |
| A_52_P147444  | Mus musculus SWI5NP related, matrix associated, actin dependent regulator of chromatin, subfamily a member 4 (Smarca4), mRNA [NM_011417]                                                                 | NM_011417        | Smarca4      | 2.758       | 2.542  |
| A_51_P233267  | Dnaj1 (Hsp40) homolog, subfamily B, member 14 [Source:MarkerSymbol; Acc:MG11917854] [ENSMUST0000090178]                                                                                                  | MG11917854       | Dnajb14      | 2.632       | 2.310  |
| A_52_P157101  | Mus musculus ataxin 2 (Atxn2), mRNA [NM_009125]                                                                                                                                                          | NM_009125        | Atxn2        | 2.543       | 2.853  |
| A_52_P18317   | Mus musculus translocase of outer mitochondrial membrane 40 homolog (yeast), mRNA (cDNA clone MGC:48245 IMAGE:3326417), complete cds. [BC038887]                                                         | BC038887         | Tomn40       | 2.513       | 1.634  |
| A_52_P568651  | Mus musculus Alstrom syndrome 1 homolog (human) (Alms1), mRNA [NM_145223]                                                                                                                                | NM_145223        | Alms1        | 2.502       | 1.425  |
| A_52_P676744  | Mus musculus ST6 (alpha-N-acetylneuraminyl-2,3-beta-galactosyl-1,3)-N-acetylgalactosaminide alpha-2,6-sialyltransferase 6 (St6Galnac6), transcript variant 1, mRNA [NM_016973]                           | NM_016973        | St6Galnac6   | 2.494       | 2.559  |
| A_51_P274833  | Mus musculus RIKEN cDNA E030041M21 gene (E030041M21R), mRNA [NM_029166]                                                                                                                                  | NM_029166        | E030041M21R  | 2.477       | 1.475  |
| A_51_P501550  | Mus musculus UDP-glucuronate decarboxylase 1 (Ucs1), mRNA [NM_026430]                                                                                                                                    | NM_026430        | Ucs1         | 2.411       | 4.874  |
| A_52_P239850  | Mus musculus CREB binding protein (Crebbp), mRNA [NM_001025432]                                                                                                                                          | NM_001025432     | Crebbp       | 2.410       | 3.975  |
| A_52_P211759  | Mus musculus pleckstrin homology domain containing, family A member 7 (Plekha7), mRNA [NM_172743]                                                                                                        | NM_172743        | Plekha7      | 2.408       | 2.273  |
| A_52_P488488  | Mus musculus 0 day neonate thymus cDNA, RIKEN full-length enriched library, clone A430103D13 product unclassifiable, full insert sequence. [AK020759]                                                    | AK020759         | A430103D13R  | 2.386       | 2.537  |
| A_52_P118958  | Mus musculus peroxisome biogenesis factor 19 (Pex19), mRNA [NM_023041]                                                                                                                                   | NM_023041        | Pax19        | 2.353       | 1.856  |
| A_52_P237871  | Mus musculus enhancer of zeste homolog 1 (Drosophila) (Ezh1), mRNA [NM_007970]                                                                                                                           | NM_007970        | Ezh1         | 2.351       | 3.252  |
| A_52_P1140541 | Mus musculus 11 days embryo gonad cDNA, RIKEN full-length enriched library, clone 7030408E13 product unclassifiable, full insert sequence [AK078575]                                                     | AK078575         | Uxs1         | 2.341       | 1.846  |
| A_52_P65471   | Mus musculus cDNA sequence BC037393 (BC037393), mRNA [NM_201369]                                                                                                                                         | NM_201369        | NAP056900-1  | 2.339       | 1.796  |
| A_52_P444785  | Mus musculus 13 days embryo whole body cDNA, RIKEN full-length enriched library, clone 3930402D05 product similar to MIP-T3 [Homo sapiens], full insert sequence [AK014457]                              | AK014457         | Trif3p1      | 2.328       | 1.726  |
| A_51_P160293  | Mus musculus 0 day neonate lung cDNA, RIKEN full-length enriched library, clone E030004A15 product unclassifiable, full insert sequence. [AK053116]                                                      | AK053116         | AK053116     | 2.301       | 2.285  |
| A_52_P884302  | Mus musculus mitogen-activated protein kinase kinase kinase kinase 4 (Map4k4), mRNA [NM_008696]                                                                                                          | NM_008696        | Map4k4       | 2.300       | 2.064  |
| A_52_P237522  | Mus musculus hyaluronan synthase 1 (Has1), mRNA [NM_008215]                                                                                                                                              | NM_008215        | Has1         | 2.299       | 1.444  |
| A_52_P222096  | Mus musculus RIKEN cDNA 4931428F04 gene (4931428F04R), mRNA [NM_028888]                                                                                                                                  | NM_028888        | 4931428F04R1 | 2.277       | 2.135  |
| A_52_P292021  | Mus musculus adult male medulla oblongata cDNA, RIKEN full-length enriched library, clone 6330583I20 product finger protein kox14 (fragment) homolog [Homo sapiens], full insert sequence [AK032094]     | AK032094         | Zfp182       | 2.266       | 4.433  |
| A_52_P497085  | Mus musculus vacuolar protein sorting 52 (yeast) (Vps52), mRNA [NM_172620]                                                                                                                               | NM_172620        | Vps52        | 2.258       | 1.488  |
| A_51_P2005170 | Mus musculus zinc finger protein 282 (Zfp282), mRNA [NM_148175]                                                                                                                                          | NM_148175        | Zfp282       | 2.220       | 6.689  |
| A_52_P491273  | Mus musculus 4 days neonate male adipose cDNA, RIKEN full-length enriched library, clone B430001J04 product hypothetical protein, full insert sequence. [AK046543]                                       | AK046543         | B430006D22R  | 2.197       | 1.986  |
| A_52_P199019  | Mus musculus tripartite motif protein 6 (Tnfr6), mRNA [NM_001013616]                                                                                                                                     | NM_001013616     | Tnfr6        | 2.177       | 1.411  |
| A_52_P128612  | Mus musculus valryl-NHase (Vars2), mRNA [NM_175137]                                                                                                                                                      | NM_175137        | Vars2        | 2.166       | 1.643  |
| A_52_P185639  | Mus musculus valryl-NHase synthetase 2, mitochondrial (putative) (Vars2), mRNA [NM_175137]                                                                                                               | NM_175137        | Vars2        | 2.149       | 2.107  |
| A_52_P141628  | Mus musculus solute carrier family 23 (nucleoside transporters), member 1 (Slc23a1), mRNA [NM_011397]                                                                                                    | NM_011397        | Slc23a1      | 2.124       | 4.382  |
| A_51_P299393  | PREDICTED: Mus musculus RIKEN cDNA 672047519 gene (672047519R), mRNA [NM_983620]                                                                                                                         | NM_983620        | E0241519R1   | 2.120       | 1.563  |
| A_52_P674418  | Mus musculus RIKEN cDNA 4930430F08 gene (4930430F08R), mRNA [NM_175128]                                                                                                                                  | NM_175128        | 4930430F08R1 | 2.117       | 2.761  |
| A_52_P502828  | Mus musculus phosphodiesterase 2A, cGMP-stimulated (Pde2a), mRNA [NM_001008548]                                                                                                                          | NM_001008548     | Pde2a        | 2.112       | 1.646  |
| A_52_P240020  | Mus musculus JTV1 gene (Jtv1), mRNA [NM_146165]                                                                                                                                                          | NM_146165        | Jtv1         | 2.071       | 2.222  |
| A_52_P429749  | Mus musculus transmembrane protein 115 (Tmem115), mRNA [NM_019704]                                                                                                                                       | NM_019704        | Tmem115      | 2.062       | 1.757  |
| A_52_P490343  | Mus musculus polybromo 1 (Pbrm1), mRNA [NM_001081251]                                                                                                                                                    | NM_001081251     | Pbrm1        | 2.061       | 4.526  |
| A_51_P350752  | Mus musculus CD37 antigen (Cd37), mRNA [NM_007645]                                                                                                                                                       | NM_007645        | Cd37         | 2.057       | 2.505  |
| A_51_P326015  | Mus musculus AXIN1 up-regulated 1 (Axu1), mRNA [NM_153287]                                                                                                                                               | NM_153287        | Axu1         | 2.055       | 1.979  |
| A_52_P588262  | Mus musculus 0 day neonate cerebellum cDNA, RIKEN full-length enriched library, clone C230096E12 product B-cell CLL [AK049064]                                                                           | AK049064         | Bcrlc        | 2.052       | 1.083  |
| A_52_P4937    | Mus musculus ligase III, DNA, ATP-dependent (Lig3), mRNA [NM_010716]                                                                                                                                     | NM_010716        | Lig3         | 2.052       | 10.447 |
| A_52_P118138  | Mus musculus spindle assembly 6 homolog (C. elegans) (Sass6), mRNA [NM_028349]                                                                                                                           | NM_028349        | Sass6        | 2.046       | 1.595  |
| A_52_P538515  | Mus musculus R3H domain 1 (brn3) single-stranded nucleic acids), mRNA (cDNA clone IMAGE:6314270), complete cds. [BC049181]                                                                               | BC049181         | R3hdm1       | 2.039       | 2.378  |
| A_52_P408237  | Mus musculus 0 day neonate cerebellum cDNA, RIKEN full-length enriched library, clone A930010C20 product unclassifiable, full insert sequence [AK044401]                                                 | AK044401         | R3hdm1       | 2.032       | 1.757  |
| A_51_P339344  | Mus musculus transmembrane protein 81 (Tmem81), mRNA [NM_029025]                                                                                                                                         | NM_029025        | Tmem81       | 2.033       | 4.973  |
| A_52_P561377  | Mus musculus expressed sequence A1450540 (A1450540), mRNA [NM_145505]                                                                                                                                    | NM_145505        | A1450540     | 2.022       | 2.796  |
| A_51_P178797  | Mus musculus LIM domain containing 2 (Lims2), mRNA [NM_172397]                                                                                                                                           | NM_172397        | Lims2        | 2.022       | 1.574  |
| A_52_P299520  | Mus musculus ectopic viral integration site 5 (Evis5), mRNA [NM_007964]                                                                                                                                  | NM_007964        | Evis5        | 2.013       | 2.216  |
| A_51_P319141  | Mus musculus SIAR-related lipid transfer (START) domain containing 5 (Stard5), mRNA [NM_023377]                                                                                                          | NM_023377        | Stard5       | 2.005       | 1.769  |
| A_52_P534355  | Mus musculus 3 days neonate thymus cDNA, RIKEN full-length enriched library, clone A630042F09 product annexin A7, full insert sequence. [AK041855]                                                       | AK041855         | AK041855     | 2.001       | 1.522  |
| A_51_P464769  | Mus musculus asp (abnormal spindle)-like, microcephaly associated (Drosophila) (Aspm), mRNA [NM_009791]                                                                                                  | NM_009791        | Aspm         | 1.969       | 1.531  |
| A_51_P477779  | Mus musculus RAR-related orphan receptor alpha (Rora), mRNA [NM_013646]                                                                                                                                  | NM_013646        | Rora         | 1.974       | 1.457  |
| A_52_P680142  | PREDICTED: Mus musculus SFT2 domain containing 3 (Sft2c3), mRNA [NM_484715]                                                                                                                              | XM_484715        | Sft2c3       | 1.976       | 1.424  |

|               |                                                                                                                                                                                                                                             |              |               |       |       |        |
|---------------|---------------------------------------------------------------------------------------------------------------------------------------------------------------------------------------------------------------------------------------------|--------------|---------------|-------|-------|--------|
| A_51_P314895  | Mus musculus cerebral cavernous malformation 2 homolog (human) (Ccm2), mRNA [NM_146014]                                                                                                                                                     | NM_146014    | Ccm2          | 1.969 | 4.050 | -1.742 |
| A_52_P442000  | Mus musculus mitogen activated protein kinase binding protein 1 (Mapkbp1), mRNA [NM_0119411]                                                                                                                                                | NM_011941    | Mapkbp1       | 1.965 | 1.571 | -1.879 |
| A_51_P135491  | Mus musculus CASP8 and FADD-like apoptosis regulator (Cflar), transcript variant 2, mRNA [NM_008805]                                                                                                                                        | NM_008805    | Cflar         | 1.950 | 2.351 | -1.011 |
| A_51_P331409  | Mus musculus transforming, acidic coiled-coil containing protein 1 (Tacc1), transcript variant 1, mRNA [NM_177089]                                                                                                                          | NM_177089    | Tacc1         | 1.948 | 3.200 | -1.148 |
| A_52_P639424  | Mus musculus golgi associated, gamma adaptin ear containing, ARF binding protein 3 (Gga3), mRNA [NM_173048]                                                                                                                                 | NM_173048    | Gga3          | 1.946 | 1.906 | -4.542 |
| A_52_P199554  | Mus musculus tRNA phosphotransferase 1 (Trpt1), mRNA [NM_153597]                                                                                                                                                                            | NM_153597    | Trpt1         | 1.943 | 1.755 | -1.184 |
| A_52_P272345  | Mus musculus cyclin H1 (Cch1), mRNA [NM_023243]                                                                                                                                                                                             | NM_023243    | Cch1          | 1.936 | 1.454 | -1.046 |
| A_51_P488092  | Mus musculus phosphodiesterase 6D, cGMP-specific, rod delta (Pde6d), mRNA [NM_008801]                                                                                                                                                       | NM_008801    | Pde6d         | 1.928 | 1.991 | -1.052 |
| A_52_P429364  | Mus musculus coiled-coil domain containing 69 (Ccdc69), mRNA [NM_177471]                                                                                                                                                                    | NM_177471    | Ccdc69        | 1.925 | 2.495 | -4.692 |
| A_51_P394984  | Mus musculus Lipin1 (Kiaa0186) mRNA, complete cds [AF180471]                                                                                                                                                                                | AF180471     | Lipin1        | 1.913 | 2.971 | -1.823 |
| A_52_P675110  | Mus musculus adult male spinal cord cDNA, RIKEN full-length enriched library, clone A330105020 product unclassifiable, full insert sequence. [AK020736]                                                                                     | AK020736     | A330105020R   | 1.902 | 1.992 | -1.044 |
| A_51_P158073  | Mus musculus RIKEN cDNA A230050P20 (A230050P20R), mRNA [NM_175687]                                                                                                                                                                          | NM_175687    | A230050P20R   | 1.899 | 1.415 | -1.083 |
| A_51_P311905  | Mus musculus transmembrane protein 103 (Tmem103), mRNA [NM_001081381]                                                                                                                                                                       | NM_001081381 | Tmem103       | 1.896 | 2.245 | -1.607 |
| A_52_P367774  | Mus musculus RIKEN cDNA 4930566A11 gene (4930566A11R), mRNA [NM_029468]                                                                                                                                                                     | NM_029468    | 4930566A11R   | 1.884 | 6.961 | -1.484 |
| A_52_P287333  | Mus musculus zinc finger, CCHC domain containing 7 (Zcchc7), mRNA [NM_177027]                                                                                                                                                               | NM_177027    | Zcchc7        | 1.873 | 2.471 | -1.225 |
| A_51_P128336  | Mus musculus serine incorporator 5 (Serinc5), mRNA [NM_172588]                                                                                                                                                                              | NM_172588    | Serinc5       | 1.866 | 1.604 | -1.109 |
| A_52_P674386  | Mus musculus 0 day neonate lung cDNA, RIKEN full-length enriched library, clone E030038D23 product hypothetical protein, full insert sequence. [AK087243]                                                                                   | AK087243     | Tmcc1         | 1.852 | 1.515 | -2.493 |
| A_52_P563765  | Mus musculus 12 days embryo embryonic body between diaphragm region and neck cDNA, RIKEN full-length enriched library, clone 9430038B09 product sine element, full insert sequence. [AK020459]                                              | AK020459     | Wtag          | 1.850 | 3.206 | -4.002 |
| A_51_P445765  | Mus musculus low density lipoprotein receptor-related protein 5, apolipoprotein e receptor (Lrp5), transcript variant 1, mRNA [NM_053073]                                                                                                   | NM_053073    | Lrp5          | 1.850 | 1.449 | -1.456 |
| A_52_P416385  | Mus musculus adult male liver tumor cDNA, RIKEN full-length enriched library, clone C730013012 product unclassifiable, full insert sequence. [AK050084]                                                                                     | AK050084     | AK050084      | 1.847 | 3.451 | -1.236 |
| A_52_P268925  | Mus musculus 16 days embryo head cDNA, RIKEN full-length enriched library, clone C130034A19 product unclassifiable, full insert sequence. [AK048089]                                                                                        | AK048089     | 9132026I24Rik | 1.845 | 1.559 | -1.298 |
| A_51_P288339  | Mus musculus OTU domain containing 5 (Clu5d), mRNA [NM_138604]                                                                                                                                                                              | NM_138604    | Clu5d         | 1.844 | 1.480 | -1.502 |
| A_52_P537863  | Mus musculus transformation related protein 53 binding protein 2 (Trp53bp2), mRNA [NM_173378]                                                                                                                                               | NM_173378    | Trp53bp2      | 1.843 | 2.947 | -1.109 |
| A_52_P411192  | Mus musculus 0 day neonate lung cDNA, RIKEN full-length enriched library, clone E030027N17 product hypothetical protein, full insert sequence. [AK053185]                                                                                   | AK053185     | Ccdc68        | 1.839 | 1.516 | -1.048 |
| A_52_P123252  | Mus musculus KH-type splicing regulatory protein (Khsrp), mRNA [NM_010513]                                                                                                                                                                  | NM_010513    | Khsrp         | 1.837 | 2.214 | -2.222 |
| A_52_P63868   | Mus musculus 0 day neonate eyeball cDNA, RIKEN full-length enriched library, clone E130111C10 product unclassifiable, full insert sequence. [AK053567]                                                                                      | AK053567     | Cflar         | 1.827 | 2.596 | -1.026 |
| A_52_P529105  | Mus musculus 0 day neonate cerebellum cDNA, RIKEN full-length enriched library, clone C230097K14 product CTCL TUMOR ANTIGEN SE102 (CUTANEOUS T-CELL LYMPHOMA TUMOR ANTIGEN SE70-2) homolog [Homo sapiens], full insert sequence. [AK049083] | AK049083     | Rbm2b         | 1.822 | 2.035 | -1.466 |
| A_52_P412796  | Mus musculus Abelson helper integration site (Ahi1), mRNA [NM_026203]                                                                                                                                                                       | NM_026203    | Ahi1          | 1.819 | 2.696 | -1.592 |
| A_52_P166365  | Mus musculus adult male urinary bladder cDNA, RIKEN full-length enriched library, clone 9530081E14 product unclassifiable, full insert sequence. [AK035649]                                                                                 | AK035649     | IT00047A11Rik | 1.813 | 1.582 | -1.974 |
| A_52_P292251  | Mus musculus adult male corpus striatum cDNA, RIKEN full-length enriched library, clone C030033Q23 product unclassifiable, full insert sequence. [AK081258]                                                                                 | AK081258     | NAP106897-1   | 1.811 | 1.404 | -1.079 |
| A_52_P395324  | Mus musculus adult male corpus striatum cDNA, RIKEN full-length enriched library, clone C030033Q23 product unclassifiable, full insert sequence. [AK081258]                                                                                 | AK081258     | AK081258      | 1.805 | 1.608 | -1.386 |
| A_51_P354077  | Mus musculus supvillin (Svll), transcript variant 1, mRNA [NM_153153]                                                                                                                                                                       | NM_153153    | Svll          | 1.805 | 1.683 | -1.032 |
| A_52_P141587  | Mus musculus RIKEN cDNA Z10418010 gene (mRNA cDNA clone MGC:116027 IMAGE 30629286), complete cds [BC090643]                                                                                                                                 | BC090643     | Z10418010Rik  | 1.797 | 2.496 | -1.066 |
| A_51_P172054  | Mus musculus growth arrest specific 6 (Gas6), mRNA [NM_019521]                                                                                                                                                                              | NM_019521    | Gas6          | 1.796 | 1.649 | -1.846 |
| A_51_P465409  | Mus musculus myeloid/lymphoid or mixed-lineage leukemia 1 (Mll1), mRNA [NM_001081049]                                                                                                                                                       | NM_001081049 | Mll1          | 1.792 | 1.419 | -1.541 |
| A_51_P321086  | Mus musculus EST X83328 (X83328), mRNA [NM_025275]                                                                                                                                                                                          | NM_025275    | X83328        | 1.790 | 1.667 | -1.021 |
| A_51_P393396  | Mus musculus poly A binding protein, cytoplasmic 4 (Pabpc4), transcript variant 2, mRNA [NM_148917]                                                                                                                                         | NM_148917    | Pabpc4        | 1.782 | 1.937 | -1.322 |
| A_52_P352131  | Mus musculus activin A receptor, type 1 (Acvr1), mRNA [NM_007394]                                                                                                                                                                           | NM_007394    | Acvr1         | 1.774 | 1.439 | -1.700 |
| A_51_P372826  | Mus musculus spermine oxidase (Smox), mRNA [NM_145533]                                                                                                                                                                                      | NM_145533    | Smox          | 1.767 | 1.521 | -1.330 |
| A_51_P221495  | Mus musculus NOL1/INOP2/Sun domain family, member 5 (Nsun5), mRNA [NM_145414]                                                                                                                                                               | NM_145414    | Nsun5         | 1.763 | 2.072 | -1.369 |
| A_52_P62514   | Mus musculus DNA segment, Chr 3, ERATO Doi 300, expressed, mRNA (cDNA clone MGC:64849 IMAGE 6400922), complete cds. [BC052702]                                                                                                              | BC052702     | D3E65300e     | 1.756 | 1.693 | -1.237 |
| A_51_P344770  | Mus musculus 12 days embryo eyball cDNA, RIKEN full-length enriched library, clone D230019K20 product hypothetical Proline-rich region containing protein, full insert sequence. [AK051922]                                                 | AK051922     | Tnfrsf6       | 1.753 | 3.565 | -1.497 |
| A_51_P231958  | Mus musculus Zwilch, kinetochore associated, homolog (Drosophila) (Zwilch), mRNA [NM_026507]                                                                                                                                                | NM_026507    | Zwilch        | 1.749 | 3.221 | -1.114 |
| A_51_P366290  | Mus musculus RIKEN cDNA 8430526N21 gene (8430526N21R), mRNA [NM_001033383]                                                                                                                                                                  | NM_001033383 | 8430526N21R   | 1.744 | 2.013 | -1.481 |
| A_52_P458130  | Mus musculus tyrosinase 1 (Tyr1), mRNA [NM_009414]                                                                                                                                                                                          | NM_009414    | Tyr1          | 1.744 | 1.944 | -1.044 |
| A_52_P339791  | Mus musculus hepatoma-derived growth factor (Hdgf), mRNA [NM_008231]                                                                                                                                                                        | NM_008231    | Hdgf          | 1.738 | 1.495 | -2.013 |
| A_52_P657240  | Mus musculus adult male lung cDNA, RIKEN full-length enriched library, clone 1200003H23 product PRE-MRNA SPLICING FACTOR PRP17 (HPRP17) (EH-BINDING PROTEIN 3) (EHB3) homolog [Homo sapiens], full insert sequence. [AK004569]              | AK004569     | Cdc40         | 1.737 | 3.877 | -1.026 |
| A_51_P165884  | Mus musculus ancient ubiquitous protein (Aup1), mRNA [NM_007517]                                                                                                                                                                            | NM_007517    | Aup1          | 1.732 | 2.125 | -2.366 |
| A_51_P453392  | Mus musculus survival motor neuron 1 (Smn1), mRNA [NM_011420]                                                                                                                                                                               | NM_011420    | Smn1          | 1.730 | 1.760 | -1.045 |
| A_52_P495699  | Mus musculus cDNA sequence BC050092 (BC050092), mRNA [NM_181419]                                                                                                                                                                            | NM_181419    | BC050092      | 1.730 | 1.553 | -1.627 |
| A_51_P264922  | Mus musculus Mouse mammary tumor virus clone 66A env precursor (env) and vSAG protein (vSAG) mRNA, complete cds [AF043686]                                                                                                                  | AF043686     | igkv14-111    | 1.716 | 1.443 | -1.920 |
| A_51_P394565  | Mus musculus sorting nexin 22 (Snx22), mRNA [NM_001025612]                                                                                                                                                                                  | NM_001025612 | Snx22         | 1.707 | 1.917 | -1.944 |
| A_51_P224468  | Mus musculus RIKEN cDNA 9430016H05 gene (9430016H05R), mRNA [NM_001081181]                                                                                                                                                                  | NM_001081181 | 9430016H05R   | 1.705 | 1.668 | -1.443 |
| A_52_P302422  | Mus musculus mitogen activated protein kinase kinase 12 (Map3k12), mRNA [NM_009582]                                                                                                                                                         | NM_009582    | Map3k12       | 1.701 | 3.681 | -1.211 |
| A_51_P193093  | Mus musculus phosphatidylethanolamine N-methyltransferase (Pemt), mRNA [NM_008819]                                                                                                                                                          | NM_008819    | Pemt          | 1.698 | 2.264 | -1.275 |
| A_52_P655167  | Mus musculus 16 days neonate cerebellum cDNA, RIKEN full-length enriched library, clone 9630005N12 product unclassifiable, full insert sequence. [AK035805]                                                                                 | AK035805     | A630026N12R   | 1.692 | 2.194 | -1.059 |
| A_51_P456980  | Mus musculus klothofin gene [AJ001373]                                                                                                                                                                                                      | AJ001373     | Igf1rb1       | 1.687 | 2.407 | -1.028 |
| A_52_P346438  | Mus musculus adult male medulla oblongata cDNA, RIKEN full-length enriched library, clone 6330547J17 product unclassifiable, full insert sequence. [AK032020]                                                                               | AK032020     | Ataf1         | 1.682 | 1.513 | -1.465 |
| A_52_P206492  | Mus musculus processing of precursor 4, ribonuclease PIMRP family, (S. cerevisiae) (Pop4), mRNA [NM_025390]                                                                                                                                 | NM_025390    | Pop4          | 1.675 | 1.612 | -1.289 |
| A_52_P996429  | Mus musculus 15 days embryo head cDNA, RIKEN full-length enriched library, clone D930043N17 product unclassifiable, full insert sequence. [AK086649]                                                                                        | AK086649     | D930043N17R   | 1.672 | 1.924 | -1.791 |
| A_52_P448205  | Mus musculus calyculin 1, mRNA (cDNA clone MGC 54504 IMAGE 6315355), complete cds. [BC053843]                                                                                                                                               | BC053843     | Cln1n1        | 1.666 | 1.525 | -1.100 |
| A_51_P328926  | Mus musculus thymopietin (Tmop), transcript variant 1, mRNA [NM_011605]                                                                                                                                                                     | NM_011605    | Tmop          | 1.659 | 1.435 | -1.037 |
| A_52_P316712  | Mus musculus tetraatricopeptide repeat domain 19 (Ttr19), transcript variant 2, mRNA [NM_029704]                                                                                                                                            | NM_029704    | Ttr19         | 1.655 | 9.663 | -1.810 |
| A_52_P1004616 | Mus musculus adult liver cDNA, RIKEN full-length enriched library, clone A930001J16 product unclassifiable, full insert sequence. [AK080694]                                                                                                | AK080694     | AK080694      | 1.653 | 1.935 | -1.192 |
| A_51_P483373  | Mus musculus thoreoxin domain containing 5 (Txndc5), mRNA [NM_145367]                                                                                                                                                                       | NM_145367    | Txndc5        | 1.648 | 2.647 | -3.851 |
| A_52_P49797   | O88614, 9GAMR (O88614), Glycosylated gag protein, partial (12%) [TC1677196]                                                                                                                                                                 | NM_146078    | Ubr2          | 1.648 | 1.744 | -1.572 |
| A_52_P499750  | Mus musculus ubiquitin protein ligase E3 component n-recogin 2 (Ubr2), mRNA [NM_146078]                                                                                                                                                     | NM_146078    | Ubr2          | 1.648 | 1.771 | -1.960 |
| A_51_P269518  | Mus musculus diacylglycerol kinase nuclear stimulator (ralgna), mRNA [NM_009016]                                                                                                                                                            | NM_009016    | Ralgna        | 1.642 | 1.603 | -1.066 |
| A_52_P433137  | Mus musculus DNA segment, Chr 12, ERATO Doi 551, expressed (D12Etd551e), mRNA [NM_028731]                                                                                                                                                   | NM_028731    | D12Etd551e    | 1.642 | 2.776 | -1.889 |
| A_52_P382565  | PREDICTED: Mus musculus similar to putative retrovirus-related gag protein (LOC669759), mRNA [XM_879891]                                                                                                                                    | XM_879891    | LOC669759     | 1.640 | 1.480 | -1.803 |
| A_52_P198767  | Mus musculus 13 days embryo forelimb cDNA, RIKEN full-length enriched library, clone 5930412E23 product unclassifiable, full insert sequence. [AK020029]                                                                                    | AK020029     | Int67         | 1.627 | 1.802 | -2.135 |
| A_51_P14321   | PREDICTED: Mus musculus Noonan syndrome candidate 1 (Nunscl), transcript variant 9 (Wntcl), mRNA [XM_868331]                                                                                                                                | XM_868331    | Int67         | 1.627 | 1.802 | -2.135 |
| A_52_P322141  | Mus musculus coiled-coil domain containing 88 (Ccdc88), mRNA [NM_001081291]                                                                                                                                                                 | NM_001081291 | Ccdc88        | 1.626 | 3.228 | -1.046 |
| A_51_P248328  | Mus musculus basic, immunoglobulin-like variable motif containing (Bivm), mRNA [NM_144558]                                                                                                                                                  | NM_144558    | Bivm          | 1.626 | P/A   | -1.429 |
| A_52_P626232  | Mus musculus ubiquitin-conjugating enzyme E2G 1 (Ubc2g1), mRNA [NM_025985]                                                                                                                                                                  | NM_025985    | Ubc2g1        | 1.615 | 2.223 | -1.170 |
| A_51_P146391  | Mus musculus ubiquitin specific peptidase 40 (Usp40), mRNA [NM_001032991]                                                                                                                                                                   | NM_001032991 | Lig4d         | 1.612 | 2.422 | -1.024 |
| A_51_P212107  | Mus musculus catenin, beta like 1 (Ctnnb1), mRNA [NM_025680]                                                                                                                                                                                | NM_025680    | Ctnnb1        | 1.611 | 1.443 | -1.149 |
| A_52_P611754  | Mus musculus DNA segment, Chr 11, Wayne State University 99, expressed (D11Wsu99e), mRNA [NM_136598]                                                                                                                                        | NM_136598    | D11Wsu99e     | 1.608 | 4.470 | -1.470 |
| A_52_P318667  | Mus musculus prenatal alcohol-1, mRNA, complete cds. [AY223547]                                                                                                                                                                             | AY223547     | AT223547      | 1.608 | 2.599 | -1.257 |
| A_51_P377496  | Mus musculus glutathione S-transferase, theta 3 (Gstt3), mRNA [NM_133994]                                                                                                                                                                   | NM_133994    | Gstt3         | 1.607 | 1.413 | -1.024 |
| A_52_P521658  | Mus musculus 10 days neonate skin cDNA, RIKEN full-length enriched library, clone 4732465J09 product MYOSIN-IXA homolog [Homo sapiens], full insert sequence. [AK028873]                                                                    | AK028873     | Myo9a         | 1.605 | 4.149 | -1.342 |
| A_51_P437377  | Mus musculus dithyrosinolate dehydrogenase (Dhodh), mRNA [NM_020046]                                                                                                                                                                        | NM_020046    | Dhodh         | 1.601 | 1.693 | -1.497 |
| A_52_P439832  | Mus musculus coiled-coil domain containing 130 (Ccdc130), mRNA [NM_026350]                                                                                                                                                                  | NM_026350    | Ccdc130       | 1.601 | 3.475 | -1.861 |
| A_52_P302463  | Mus musculus ADP-ribosylation factor-like 5A (Arf5a), mRNA [NM_162994]                                                                                                                                                                      | NM_162994    | Arf5a         | 1.600 | 1.741 | -1.152 |
| A_51_P363564  | Mus musculus transformation related protein 53 binding protein 2 (Trp53bp2), mRNA [NM_173378]                                                                                                                                               | NM_173378    | Trp53bp2      | 1.600 | 2.553 | -1.192 |
| A_51_P132849  | Mus musculus calcium/calmodulin-dependent protein kinase II gamma (Camk2g), transcript variant 1, mRNA [NM_178597]                                                                                                                          | NM_178597    | Camk2g        | 1.598 | 2.101 | -1.009 |
| A_52_P18805   | Mus musculus growth factor my1 (S. cerevisiae) (Glf1), transcript variant 1, mRNA (cDNA clone MGC 53681), full insert sequence. [BC028694]                                                                                                  | NM_023440    | Glf1          | 1.595 | 1.893 | -0.952 |
| A_52_P532841  | Mus musculus expressed sequence C87436 (C87436), mRNA [NM_146170]                                                                                                                                                                           | NM_146170    | C87436        | 1.592 | 1.401 | -1.655 |
| A_52_P326399  | Mus musculus FK506 binding protein 11 (Fkbp11), mRNA [NM_024169]                                                                                                                                                                            | NM_024169    | Fkbp11        | 1.587 | 3.505 | -3.994 |
| A_52_P674847  | Mus musculus 5-azacytidine induced gene 2 (Az2), transcript variant 1, mRNA [NM_013727]                                                                                                                                                     | NM_013727    | Az2           | 1.585 | 1.849 | -1.404 |
| A_51_P18616   | Mus musculus DNA segment, ERATO Doi 551, expressed (D12Etd551e), mRNA [NM_028731]                                                                                                                                                           | BC028694     | BC028694      | 1.579 | 1.918 | -1.861 |
| A_52_P641758  | Mus musculus RIKEN cDNA A030007L17 gene (A030007L17R), mRNA [NM_026637]                                                                                                                                                                     | NM_026637    | A030007L17R   | 1.579 | 1.723 | -1.956 |
| A_51_P234263  | Mus musculus RAB5B, member RAS oncogene family (Rab5b), mRNA [NM_011229]                                                                                                                                                                    | NM_011229    | Rab5b         | 1.578 | 1.571 | -2.008 |



|               |                                                                                                                                                                                                                                                               |              |               |       |       |        |
|---------------|---------------------------------------------------------------------------------------------------------------------------------------------------------------------------------------------------------------------------------------------------------------|--------------|---------------|-------|-------|--------|
| A_52_P555913  | Mus musculus neurofibromatosis 2 (NF2), mRNA [NM_010998]                                                                                                                                                                                                      | NM_010998    | Nf2           | 1.576 | 2.133 | -1.180 |
| A_52_P24722   | Mus musculus 16 days neonate thymus cDNA, RIKEN full-length enriched library, clone A130073N12 product unclassifiable, full insert sequence [AK038044]                                                                                                        | AK038044     | AK038044      | 1.572 | 1.540 | -1.161 |
| A_52_P331382  | Mus musculus premature mRNA for mkl4/1167 protein [AK173119]                                                                                                                                                                                                  | AK173119     | Gripap1       | 1.566 | 1.419 | -1.286 |
| A_52_P419873  | Mus musculus retinoblastoma 1 (Rb1), mRNA [NM_009029]                                                                                                                                                                                                         | NM_009029    | Rb1           | 1.566 | 1.547 | -1.909 |
| A_51_P405280  | Mus musculus Kruppel-like factor 7 (ubiquitous) (Klf7), mRNA [NM_033563]                                                                                                                                                                                      | NM_033563    | Klf7          | 1.562 | 1.687 | -1.347 |
| A_52_P625653  | Mus musculus peroxisomal membrane protein 4 (Pmp4), mRNA [NM_021534]                                                                                                                                                                                          | NM_021534    | Pmp4          | 1.560 | 2.372 | -1.061 |
| A_51_P125171  | Mus musculus solute carrier family 25, member 27 (Slc25a27), mRNA [NM_028711]                                                                                                                                                                                 | NM_028711    | Slc25a27      | 1.551 | 1.642 | -2.561 |
| A_51_P138830  | Mus musculus cDNA sequence BC023055 (BC023055), mRNA [NM_198108]                                                                                                                                                                                              | NM_198108    | BC023055      | 1.544 | 2.145 | -1.393 |
| A_51_P2251245 | Mus musculus plakophilin 4 (Pkp4), mRNA [NM_026361]                                                                                                                                                                                                           | NM_026361    | Pkp4          | 1.541 | 1.744 | -1.285 |
| A_51_P4477018 | Mus musculus adult male testis cDNA, RIKEN full-length enriched library, clone 4930532K22 product hypothetical Ribonuclease Rb-like structure containing protein, full insert sequence. [AK015947]                                                            | AK015947     | Rnase12a      | 1.539 | 1.605 | -1.528 |
| A_51_P272046  | Mus musculus catenin (cadherin associated protein), beta 1 (Ctnnb1), mRNA [NM_007614]                                                                                                                                                                         | NM_007614    | Ctnnb1        | 1.537 | 1.555 | -1.113 |
| A_52_P188593  | Mus musculus gene model 447. (NCBI) (Gm447), mRNA [NM_001007590]                                                                                                                                                                                              | NM_001007590 | Gm447         | 1.534 | 1.617 | -1.245 |
| A_52_P80021   | Mus musculus CKLF-like MARVEL transmembrane domain containing 7, mRNA (cDNA clone IMAGE3982549), complete cds. [BC026773]                                                                                                                                     | BC026773     | Ctmn7         | 1.530 | 1.544 | -1.271 |
| A_51_P4457113 | Mus musculus retinoblastoma-like 2 (Rb2), mRNA [NM_011250]                                                                                                                                                                                                    | NM_011250    | Rb2           | 1.527 | 1.653 | -1.716 |
| A_52_P427394  | Mus musculus adult male aorta and vein cDNA, RIKEN full-length enriched library, clone A530076C18 product unclassifiable, full insert sequence. [AK080173]                                                                                                    | AK080173     | E130112N10R   | 1.525 | 3.222 | -5.626 |
| A_51_P253527  | Mus musculus ring finger and FYVE like domain containing protein (Rff), transcript variant 2, mRNA [NM_026097]                                                                                                                                                | NM_026097    | Rff           | 1.524 | 2.568 | -1.440 |
| A_51_P198410  | Mus musculus mRNA for Grb3-3, isoform of Grb2, complete cds. [D85748]                                                                                                                                                                                         | D85748       | Grb2          | 1.522 | 1.912 | -1.225 |
| A_52_P1152468 | Mus musculus 3 days neonate thymus cDNA, RIKEN full-length enriched library, clone A630010G17 product unclassifiable, full insert sequence. [AK153595]                                                                                                        | AK153595     | AK153595      | 1.520 | 1.558 | -1.274 |
| A_52_P569759  | Mus musculus 12 days embryo female mullerian duct includes surrounding region cDNA, RIKEN full-length enriched library, clone 6820426C07 product BETA-CENTRACTIN (ACTIN-RELATED PROTEIN 1B) (ARPB1) homolog [Homo sapiens], full insert sequence [AK078508]   | AK078508     | Acr1b1        | 1.519 | 1.774 | -1.185 |
| A_51_P401527  | Mus musculus RNA methyltransferase like 1 (Rnm1), mRNA [NM_183263]                                                                                                                                                                                            | NM_183263    | Rnm1          | 1.515 | 1.621 | -1.088 |
| A_52_P373480  | Mus musculus adult male corpora quadrigemina cDNA, RIKEN full-length enriched library, clone B230345H22 product unclassifiable, full insert sequence. [AK046154]                                                                                              | AK046154     | AK046154      | 1.514 | 3.111 | -1.151 |
| A_51_P316129  | Mus musculus solute carrier related 4A (yeast) (Asp4A), mRNA [NM_174875]                                                                                                                                                                                      | NM_174875    | Asp4A         | 1.508 | 1.642 | -1.167 |
| A_52_P91359   | Mus musculus zinc finger protein 655 (Zfp655), transcript variant 2, mRNA [NM_001083958]                                                                                                                                                                      | NM_001083958 | Zfp655        | 1.505 | 1.725 | -1.913 |
| A_51_P310254  | Mus musculus RIKEN cDNA 3110048E14 gene (3110048E14Rik), transcript variant 1, mRNA [NM_133750]                                                                                                                                                               | NM_133750    | 3110048E14Rik | 1.504 | 1.897 | -1.090 |
| A_51_P462546  | Mus musculus GDP-mannose pyrophosphorylase A (Gmpaa), mRNA [NM_133708]                                                                                                                                                                                        | NM_133708    | Gmpaa         | 1.500 | 2.429 | -1.885 |
| A_52_P599038  | Mus musculus bifurcational apoptosis regulator (Bfar), mRNA [NM_025976]                                                                                                                                                                                       | NM_025976    | Bfar          | 1.496 | 1.446 | -1.565 |
| A_51_P313467  | Mus musculus CTD (carboxy-terminal domain, RNA polymerase II, polypeptide A) phosphatase, subunit 1 (Ctdp1), mRNA [NM_026295]                                                                                                                                 | NM_026295    | Ctdp1         | 1.495 | 1.806 | -2.600 |
| A_52_P5945    | Mus musculus adult male olfactory brain cDNA, RIKEN full-length enriched library, clone 6430402E12 product hypothetical protein, full insert sequence. [AK032149]                                                                                             | AK032149     | Pparg1a       | 1.492 | 1.518 | -1.366 |
| A_51_P159624  | Mus musculus splicing factor, arginine/serine-rich 8 (Sfrs8), mRNA [NM_172276]                                                                                                                                                                                | NM_172276    | Sfrs8         | 1.491 | 5.538 | -1.711 |
| A_52_P867113  | Mus musculus 9 days embryo whole body cDNA, RIKEN full-length enriched library, clone D030052H06 product unclassifiable, full insert sequence. [AK050966]                                                                                                     | AK050966     | AK050966      | 1.488 | 1.553 | -2.110 |
| A_52_P674464  | Mus musculus RIKEN cDNA 2810055G22 gene (2810055G22Rik), mRNA [NM_080561]                                                                                                                                                                                     | NM_080561    | 2810055G22R   | 1.487 | 3.228 | -1.463 |
| A_51_P314264  | Mus musculus signal sequence receptor, beta (Ssr2), mRNA [NM_025448]                                                                                                                                                                                          | NM_025448    | Ssr2          | 1.487 | 1.950 | -2.163 |
| A_52_P695036  | Mus musculus vacuolar protein sorting 72 (yeast) (Vps72), mRNA [NM_069336]                                                                                                                                                                                    | NM_069336    | Vps72         | 1.485 | 2.555 | -1.361 |
| A_52_P536394  | Mus musculus membrane-associated ring finger (c3h1c4) 5 (March6), mRNA [NM_172606]                                                                                                                                                                            | NM_172606    | March6        | 1.485 | 1.446 | -1.224 |
| A_52_P51936   | Mus musculus 13 days embryo lung cDNA, RIKEN full-length enriched library, clone D430022A14 product unclassifiable, full insert sequence [AK084992]                                                                                                           | AK084992     | D430022A14R   | 1.482 | 2.167 | -1.568 |
| A_52_P597800  | Mus musculus ets variant gene 6 (Tel, oncogene) (Etv6), mRNA [NM_007961]                                                                                                                                                                                      | NM_007961    | Etv6          | 1.480 | 1.731 | -1.977 |
| A_52_P755439  | Mus musculus 7 days neonate cerebellum cDNA, RIKEN full-length enriched library, clone A730094G16 product unspliced dna for: PROLIFERATION RELATED ACIDIC LEUCINE RICH PROTEIN PAL31 (SIMILAR TO ACIDIC PROTEIN RICH IN LEUCINES) homolog [Mus musculus], ... | AK043419     | Ans32b        | 1.479 | 2.375 | -1.238 |
| A_52_P262279  | Mus musculus zinc finger and BTB domain containing 11, mRNA (cDNA clone IMAGE 6485438) [BC056403]                                                                                                                                                             | BC056403     | Zbn11         | 1.479 | 1.858 | -1.390 |
| A_52_P569524  | Mus musculus 7 days embryo whole body cDNA, RIKEN full-length enriched library, clone C430019H13 product RIKEN cDNA 4930421J07 gene, full insert sequence. [AK049524]                                                                                         | AK049524     | AK049524      | 1.477 | 1.629 | -1.664 |
| A_52_P499577  | Mus musculus 9 days embryo whole body cDNA, RIKEN full-length enriched library, clone D030036P13 product unclassifiable, full insert sequence [AK083507]                                                                                                      | AK083507     | D030036P13R   | 1.475 | 1.442 | -1.050 |
| A_52_P430369  | Mus musculus ATG9 autophagy related 9 homolog B (S. cerevisiae) (Atg9b), mRNA [NM_001002897]                                                                                                                                                                  | NM_001002897 | Atg9b         | 1.469 | 1.514 | -1.553 |
| A_51_P371152  | PREDICTED, Mus musculus Son of sevenless homolog 2 (Drosophila) (Sov2), mRNA [XM_127051]                                                                                                                                                                      | XM_127051    | Sov2          | 1.467 | 1.848 | -1.276 |
| A_51_P314929  | Mus musculus 0 day neonate head cDNA, RIKEN full-length enriched library, clone 4832425N18 product DIACYLGLYCEROL KINASE, DELTA (EC 2.7.1.107) (DIGLYCERIDE KINASE) (DGK-DELTA) (DAG KINASE DELTA) (FRAGMENT) homolog [Homo...                                | AK076439     | Dgkd          | 1.467 | 2.081 | -1.400 |
| A_51_P185701  | Mus musculus dynam 1-like (Dnm1), transcript variant 1, mRNA [NM_152816]                                                                                                                                                                                      | NM_152816    | Dnm1          | 1.465 | 1.435 | -1.370 |
| A_52_P394561  | Mus musculus adult male hippocampus cDNA, RIKEN full-length enriched library, clone 2010001F03 product ADULT MALE SMALL INTESTINE CDNA, RIKEN FULL-LENGTH ENRICHED LIBRARY, CLONE:2010001F03, FULL INSERT SEQUENCE, full insert sequence. [AK008004]          | AK008004     | Tynd2         | 1.451 | 2.034 | -1.074 |
| A_51_P101858  | Mus musculus discs, large homolog 1 (Drosophila) (Dlg1), mRNA [NM_007862]                                                                                                                                                                                     | NM_007862    | Dlg1          | 1.460 | 1.481 | -1.339 |
| A_51_P463270  | Mus musculus adult male hippocampus cDNA, RIKEN full-length enriched library, clone C630012M08 product SNRNA ACTIVATING PROTEIN COMPLEX 50 KDA SUBUNIT (SNAPC 50 KDA SUBUNIT) (PROXIMAL SEQUENCE ELEMENT-BINDING TRANSCRIPTION FACTOR BETA SUBUNIT) (PSE-B... | AK049933     | Snapc3        | 1.460 | 1.983 | -1.042 |
| A_51_P491835  | Mus musculus adult male hippocampus cDNA, RIKEN full-length enriched library, clone 2900009J20 product inferred: RIKEN cDNA 2900009J20 gene, full insert sequence [AK031507]                                                                                  | AK031507     | 2900009J20R   | 1.453 | 1.528 | -1.623 |
| A_52_P411174  | Mus musculus 5 days neonate thymus cDNA, RIKEN full-length enriched library, clone A630074J11 product unclassifiable, full insert sequence. [AK042243]                                                                                                        | AK042243     | Anch1         | 1.452 | 1.442 | -1.161 |
| A_52_P24593   | Mus musculus zinc finger, DHHC domain containing 20 (Zfhhc20), mRNA [NM_029492]                                                                                                                                                                               | NM_029492    | Zfhhc20       | 1.452 | 2.193 | -1.476 |
| A_51_P284233  | Mus musculus proline-rich Gla (G-carboxyglutamic acid) polypeptide 2 (Prrg2), mRNA [NM_022999]                                                                                                                                                                | NM_022999    | Prrg2         | 1.451 | 2.053 | -1.355 |
| A_51_P335729  | Mus musculus adult male spinal cord cDNA, RIKEN full-length enriched library, clone A330033H49 product nuclear receptor subfamily 2, group C, member 2, full insert sequence. [AK039370]                                                                      | AK039370     | AK039370      | 1.450 | 1.806 | -1.191 |
| A_51_P142896  | Mus musculus cDNA testis (Ct59a), mRNA [NM_007652]                                                                                                                                                                                                            | NM_007652    | Ct59a         | 1.448 | 1.622 | -1.925 |
| A_52_P202358  | Mus musculus mRNA for PEBP2aB protein, complete cds. [D13802]                                                                                                                                                                                                 | D13802       | Rumr1         | 1.444 | 2.224 | -1.886 |
| A_52_P137145  | Mus musculus 13 days embryo male testis cDNA, RIKEN full-length enriched library, clone 6030423J02 product weakly similar to CDNA FLJ14936 FIS, CLONE PLACE1010194, WEAKLY SIMILAR TO SPLICING FACTOR, ARGININE/SERINE-RICH 2 [Homo sapiens], full insert...  | AK031401     | Ppif38a       | 1.443 | 2.878 | -5.650 |
| A_51_P203710  | Mus musculus taube nuss (Ton), mRNA [NM_022015]                                                                                                                                                                                                               | NM_022015    | Ton           | 1.441 | 1.704 | -1.291 |
| A_51_P469398  | Mus musculus glucosylase, alpha, neutral C (Gnac), mRNA [NM_172672]                                                                                                                                                                                           | NM_172672    | Gnac          | 1.439 | 1.890 | -2.121 |
| A_51_P257684  | Mus musculus stauferin (RNA binding protein) homolog 1 (Drosophila) (Stau1), mRNA [NM_011490]                                                                                                                                                                 | NM_011490    | Stau1         | 1.433 | 2.528 | -2.159 |
| A_52_P497193  | Mus musculus nuclear core complex associated 2 homolog (S. cerevisiae) (Noc2), mRNA [NM_021303]                                                                                                                                                               | NM_021303    | Noc2          | 1.433 | 1.482 | -1.206 |
| A_51_P359963  | Mus musculus Rho GTPase activating protein 17 (Arhgap17), mRNA [NM_144529]                                                                                                                                                                                    | NM_144529    | Arhgap17      | 1.431 | 1.478 | -1.170 |
| A_52_P303596  | Mus musculus RIKEN cDNA 1700200O3 gene (1700200O3Rik), mRNA [NM_027405]                                                                                                                                                                                       | NM_027405    | 1700200O3R    | 1.430 | 1.522 | -1.523 |
| A_51_P139165  | Mus musculus arginine/serine-rich coiled-coil 1 (Rsrc1), mRNA [NM_025822]                                                                                                                                                                                     | NM_025822    | Rsrc1         | 1.428 | 2.381 | -1.409 |
| A_52_P529049  | Mus musculus 5T20-like kinase 5 (Tesk), mRNA [NM_009289]                                                                                                                                                                                                      | NM_009289    | Sik           | 1.425 | 1.519 | -1.218 |
| A_51_P226332  | Mus musculus solute carrier family 18, member 2 (Slc19a2), mRNA [NM_054087]                                                                                                                                                                                   | NM_054087    | Slc19a2       | 1.425 | 1.684 | -1.004 |
| A_51_P331318  | Mus musculus Sdc-like 2 (Bc2l2), mRNA [NM_007537]                                                                                                                                                                                                             | NM_007537    | Bc2l2         | 1.425 | 2.604 | -1.161 |
| A_51_P130824  | Mus musculus component of oligomeric golgi complex 8 (Cog8), mRNA [NM_139229]                                                                                                                                                                                 | NM_139229    | Cog8          | 1.420 | 2.536 | -1.561 |
| A_51_P250433  | Mus musculus additional sex combs like 2 (Drosophila) (Asx2), mRNA [NM_172421]                                                                                                                                                                                | NM_172421    | Asx2          | 1.418 | 1.581 | -1.076 |
| A_51_P135155  | Mus musculus two pore segment channel 2 (Pp2c2), mRNA [NM_146206]                                                                                                                                                                                             | NM_146206    | Pp2c2         | 1.417 | 1.436 | -1.521 |
| A_51_P300717  | Mus musculus syntaxin binding protein 1 (Stxbp1), mRNA [NM_009295]                                                                                                                                                                                            | NM_009295    | Stxbp1        | 1.410 | 2.816 | -1.272 |
| A_51_P422369  | Mus musculus RIKEN cDNA 2010001J22 gene (2010001J22Rik), mRNA [NM_001013022]                                                                                                                                                                                  | NM_001013022 | 2010001J22Rik | 1.409 | 3.152 | -1.396 |
| A_52_P137361  | Mus musculus transmembrane channel-like gene family 4 (Tmc4), mRNA [NM_181820]                                                                                                                                                                                | NM_181820    | Tmc4          | 1.408 | 1.874 | -1.904 |
| A_51_P207340  | Mus musculus transmembrane protein 117 (Tmem117), mRNA [NM_176789]                                                                                                                                                                                            | NM_176789    | Tmem117       | 1.406 | 1.436 | -1.450 |
| A_52_P684057  | Mus musculus snurportin 1 (Snupn), mRNA [NM_178374]                                                                                                                                                                                                           | NM_178374    | Snupn         | 1.404 | 2.414 | -1.209 |
| A_51_P220040  | Mus musculus 16 days embryo head cDNA, RIKEN full-length enriched library, clone C130039I05 product unclassifiable, full insert sequence. [AK048190]                                                                                                          | AK048190     | AK048190      | 1.403 | 2.517 | -1.052 |

**Table S4. Genes downregulated in 2C9.G2-treated HSCs cultured in the presence of TPO**

The values are fold changes in 2C9.G2-treated vs. IgG-treated cells under the indicated conditions. A and P represent detection of the calls “Absence” and “Presence,” respectively.

| ProbeName     | Description                                                                                                                                                                                                                                                   | GenbankAccession | GeneSymbol     | Fold change |        |       |
|---------------|---------------------------------------------------------------------------------------------------------------------------------------------------------------------------------------------------------------------------------------------------------------|------------------|----------------|-------------|--------|-------|
|               |                                                                                                                                                                                                                                                               |                  |                | SCF + TPO   | SCF    |       |
| A_51_P270741  | Mus musculus synaptogyrin 1 (Syngr1), transcript variant 1b, mRNA [NM_009303]                                                                                                                                                                                 | NM_009303        | Syngr1         | -5.636      | -1.854 | 4.022 |
| A_51_P476728  | Mus musculus neogenin (Neo1), transcript variant 1, mRNA [NM_008684]                                                                                                                                                                                          | NM_008684        | Neo1           | -5.480      | -1.606 | 1.046 |
| A_51_P442458  | Mus musculus 14 days embryo liver cDNA, RIKEN full-length enriched library, clone 4432404P07 product/hypothetical protein, full insert sequence. [AK014475]                                                                                                   | AK014475         | Brs6           | -5.356      | -1.466 | 1.464 |
| A_51_P519696  | Mus musculus muscle and microspikes RAS (Mras), mRNA [NM_008624]                                                                                                                                                                                              | NM_008624        | Mras           | -4.508      | -1.893 | 1.013 |
| A_51_P433843  | Mus musculus RIKEN cDNA 3110004L20 gene (3110004L20Rik), mRNA [NM_001033167]                                                                                                                                                                                  | NM_001033167     | 3110004L20Rik  | -4.452      | -1.869 | 1.493 |
| A_51_P243545  | Mus musculus kinesin family member 16B (Kif16b), mRNA [NM_001081133]                                                                                                                                                                                          | NM_001081133     | Kif16b         | -4.433      | -1.658 | 1.299 |
| A_51_P244767  | Mus musculus Cx36-like MARVEL transmembrane domain containing 4 (Ctmr4), mRNA [NM_153582]                                                                                                                                                                     | NM_153582        | Ctmr4          | -4.240      | -1.726 | 5.087 |
| A_51_P339356  | Mus musculus ring finger protein 24 (Rnf24), mRNA [NM_178607]                                                                                                                                                                                                 | NM_178607        | Rnf24          | -4.091      | -3.753 | 2.885 |
| A_51_P119544  | Mus musculus aspartylglucosaminidase (Aga), mRNA [NM_001005847]                                                                                                                                                                                               | NM_001005847     | Aga            | -3.970      | -2.575 | 1.908 |
| A_51_P263537  | Mus musculus cAMP responsive element binding protein-like 1 (Creb1), mRNA [NM_017406]                                                                                                                                                                         | NM_017406        | Creb1          | -3.953      | -1.786 | 1.348 |
| A_52_P337550  | Mus musculus UBX domain containing 8 (Ubx8), mRNA [NM_178397]                                                                                                                                                                                                 | NM_178397        | Ubx8           | -3.902      | -1.526 | 1.317 |
| A_52_P282091  | Mus musculus 7 days neonate cerebellum cDNA, RIKEN full-length enriched library, clone A730083G01 product/Kruppel associated box (KRAB) zinc finger 1, full insert sequence. [AK043310]                                                                       | AK043310         | Zfp386         | -3.782      | -1.909 | 1.399 |
| A_51_P370561  | Mus musculus dephospho-CoA kinase domain containing (Dcokd), mRNA [NM_026551]                                                                                                                                                                                 | NM_026551        | Dcokd          | -3.765      | -2.971 | 1.034 |
| A_52_P566786  | Mus musculus 2 days pregnant adult female oviduct cDNA, RIKEN full-length enriched library, clone E230014G11 product/hypothetical protein, full insert sequence. [AK054043]                                                                                   | AK054043         | AK054043       | -3.745      | -1.617 | 2.631 |
| A_52_P72487   | Mus musculus cDNA sequence A232717 (A232717), mRNA [NM_011636]                                                                                                                                                                                                | NM_011636        | A232717        | -3.706      | -2.554 | 1.938 |
| A_52_P572456  | Mus musculus interferon stimulated exonuclease gene 20-like 2 (Isg20l2), mRNA [NM_177663]                                                                                                                                                                     | NM_177663        | Isg20l2        | -3.621      | -2.409 | 2.849 |
| A_51_P444401  | Mus musculus 0 day neonate thymus cDNA, RIKEN full-length enriched library, clone A430017P04 product/unclassifiable, full insert sequence [AK039840]                                                                                                          | AK039840         | 2900010J23Rik  | -3.428      | -1.615 | 1.344 |
| A_52_P471947  | Mus musculus chromodomain protein, Y chromosome-like (Cdy), mRNA [NM_009881]                                                                                                                                                                                  | NM_009881        | Cdy            | -3.356      | -1.534 | 2.108 |
| A_52_P276966  | Mus musculus poly (ADP-ribose) polymerase family, member 14 (Parp14), mRNA [NM_001039530]                                                                                                                                                                     | NM_001039530     | Parp14         | -3.292      | -1.550 | 1.478 |
| A_51_P514712  | Mus musculus poly (ADP-ribose) polymerase family, member 14 (Parp14), mRNA [NM_001039530]                                                                                                                                                                     | NM_001039530     | Parp14         | -3.232      | -1.606 | 1.683 |
| A_52_P421096  | Mus musculus Bn3 binding protein (Bn3bp), mRNA [NM_029752]                                                                                                                                                                                                    | NM_029752        | Bn3bp          | -3.218      | -3.393 | 1.007 |
| A_51_P179604  | Mus musculus geranylgeranyl diphosphate synthase 1 (Gggs1), mRNA [NM_010282]                                                                                                                                                                                  | NM_010282        | Gggs1          | -3.186      | -1.626 | 1.247 |
| A_52_P15076   | Mus musculus talin 1 (Tln1), mRNA [NM_011602]                                                                                                                                                                                                                 | NM_011602        | Tln1           | -3.119      | -1.894 | 1.232 |
| A_52_P460095  | Mus musculus polymerase (DNA directed), kappa (Polk), mRNA [NM_012048]                                                                                                                                                                                        | NM_012048        | Polk           | -3.098      | -5.172 | 1.055 |
| A_51_P111562  | Mus musculus Ras and Rab interactor 3 (Rin3), mRNA [NM_177620]                                                                                                                                                                                                | NM_177620        | Rin3           | -3.072      | -2.290 | 1.930 |
| A_52_P238816  | Mus musculus palmitoyl-protein thioesterase 2 (Pp2c), mRNA [NM_019441]                                                                                                                                                                                        | NM_019441        | Pp2c           | -3.004      | -1.421 | 1.657 |
| A_51_P284565  | Mus musculus transmembrane protein 57 (Tmem57), mRNA [NM_133706]                                                                                                                                                                                              | NM_133706        | Tmem57         | -2.963      | -2.069 | 2.241 |
| A_52_P580895  | Mus musculus synovial apoptosis inhibitor 1, synoviolin (Synv1), mRNA [NM_028769]                                                                                                                                                                             | NM_028769        | Synv1          | -2.962      | -3.888 | 1.569 |
| A_52_P523503  | Mus musculus transmembrane protein 154 (Tmem154), mRNA [NM_177260]                                                                                                                                                                                            | NM_177260        | Tmem154        | -2.924      | -2.703 | 7.625 |
| A_52_P260994  | Mus musculus FYVE, RhoGEF and PH domain containing 2 (Fgpc2), mRNA [NM_013710]                                                                                                                                                                                | NM_013710        | Fgpc2          | -2.924      | -1.583 | 1.230 |
| A_51_P325124  | Mus musculus anterior pharynx defective 1b homolog (C. elegans) (Aph1b), mRNA [NM_175883]                                                                                                                                                                     | NM_175883        | Aph1b          | -2.904      | -1.421 | 2.111 |
| A_52_P452494  | Mus musculus zinc finger protein 263 (Zfp263), mRNA [NM_148924]                                                                                                                                                                                               | NM_148924        | Zfp263         | -2.894      | -1.405 | 1.616 |
| A_51_P139597  | Mus musculus F-box and leucine-rich repeat protein 10 (Fbx10), transcript variant 1, mRNA [NM_001003953]                                                                                                                                                      | NM_001003953     | Fbx10          | -2.866      | -2.565 | 1.348 |
| A_51_P491437  | Mus musculus BTB (POZ) domain containing 9 (Btd9), mRNA [NM_172618]                                                                                                                                                                                           | NM_172618        | Btd9           | -2.832      | -1.409 | 1.268 |
| A_51_P124550  | Mus musculus receptor accessory protein 6 (Reep6), mRNA [NM_139292]                                                                                                                                                                                           | NM_139292        | Reep6          | -2.824      | -1.493 | 2.436 |
| A_52_P200599  | Mus musculus RIKEN cDNA 3110001I20 gene (3110001I20Rik), mRNA [NM_177608]                                                                                                                                                                                     | NM_177608        | 3110001I20Rik  | -2.813      | -2.110 | 1.741 |
| A_51_P442097  | Mus musculus solute carrier family 41, member 3 (Slc41a3), transcript variant 1, mRNA [NM_027868]                                                                                                                                                             | NM_027868        | Slc41a3        | -2.806      | -3.266 | 1.092 |
| A_51_P195129  | Mus musculus shroom family member 3 (Shroom3), transcript variant 1, mRNA [NM_015756]                                                                                                                                                                         | NM_015756        | Shroom3        | -2.799      | -7.043 | 1.024 |
| A_51_P335849  | Mus musculus catenin beta interacting protein 1 (Ctbnip1), mRNA [NM_023465]                                                                                                                                                                                   | NM_023465        | Ctbnip1        | -2.775      | -4.060 | 2.038 |
| A_51_P279197  | Mus musculus ataxin 1 (Atxn1), mRNA [NM_009124]                                                                                                                                                                                                               | NM_009124        | Atxn1          | -2.685      | -1.473 | 1.020 |
| A_52_P193533  | Mus musculus osteoclast-like cell cDNA, RIKEN full-length enriched library, clone I420029E17 product/similar to Brain mitochondrial carrier protein-1 (BMCP-1) (Mitochondrial uncoupling protein 5) (UCP 5) (Solute carrier family 25, member 14) (UNG0791... | AK159732         | Slc25a30       | -2.668      | -1.456 | 1.721 |
| A_51_P222280  | Mus musculus inhibitor of kappaB kinase epsilon (Ikkbe), mRNA [NM_019771]                                                                                                                                                                                     | NM_019771        | Ikkbe          | -2.636      | -7.757 | 2.209 |
| A_52_P361664  | Mus musculus vesicle transport interaction with T-SNAREs homolog 1A (Vsta), mRNA [NM_016862]                                                                                                                                                                  | NM_016862        | Vsta           | -2.632      | -1.552 | 1.213 |
| A_51_P132549  | Mus musculus thyroid hormone receptor interactor 10 (Trip10), mRNA [NM_134125]                                                                                                                                                                                | NM_134125        | Trip10         | -2.628      | -2.034 | 1.353 |
| A_52_P245059  | Mus musculus RUN and TBC1 domain containing 1 (Rutbc1), mRNA [NM_197943]                                                                                                                                                                                      | NM_197943        | Rutbc1         | -2.611      | -4.067 | 1.243 |
| A_51_P122035  | Mus musculus ubiquitin specific peptidase 20 (Usp20), mRNA [NM_026646]                                                                                                                                                                                        | NM_026646        | Usp20          | -2.590      | -2.751 | 1.151 |
| A_52_P280443  | Mus musculus CDK5 regulatory subunit associated protein 2 (Cdk5rap2), mRNA [NM_145990]                                                                                                                                                                        | NM_145990        | Cdk5rap2       | -2.579      | -5.199 | 3.046 |
| A_51_P396364  | Mus musculus CDK5 regulatory subunit associated protein 2 (Cdk5rap2), mRNA [NM_145990]                                                                                                                                                                        | NM_145990        | Cdk5rap2       | -2.577      | -2.147 | 2.727 |
| A_51_P339232  | Mus musculus tyrtrophin, acidic 1 (Snta1), mRNA [NM_009228]                                                                                                                                                                                                   | NM_009228        | Snta1          | -2.564      | -1.736 | 2.023 |
| A_51_P411809  | Mus musculus tyrosine 5 silent mating type information regulation 2 homolog 5 (S. cerevisiae) (Sirt5), mRNA [NM_178848]                                                                                                                                       | NM_178848        | Sirt5          | -2.546      | -1.493 | 1.507 |
| A_51_P234833  | Mus musculus striatin, calmodulin binding protein 4 (Strn4), transcript variant 1, mRNA [NM_133789]                                                                                                                                                           | NM_133789        | Strn4          | -2.537      | -3.315 | 2.279 |
| A_52_P643415  | Mus musculus SCY1-like 2 (S. cerevisiae) (Scyl2), mRNA [NM_198021]                                                                                                                                                                                            | NM_198021        | Scyl2          | -2.513      | -1.484 | 4.935 |
| A_51_P373696  | Mus musculus mRNA for mKIAA1819 protein. [AK129448]                                                                                                                                                                                                           | AK129448         | Mam2           | -2.495      | -1.779 | 1.331 |
| A_52_P497334  | Mus musculus MYC-associated zinc finger protein (zinc-binding transcription factor) (Maz), mRNA [NM_010772]                                                                                                                                                   | NM_010772        | Maz            | -2.495      | -1.409 | 1.987 |
| A_51_P440807  | Mus musculus carnitine acetyltransferase (Crat), mRNA [NM_007760]                                                                                                                                                                                             | NM_007760        | Crat           | -2.460      | -1.400 | 1.196 |
| A_51_P390181  | Mus musculus 0 day neonate thymus cDNA, RIKEN full-length enriched library, clone A430081O12 product/unclassifiable, full insert sequence [AK040105]                                                                                                          | AK040105         | A430081O12Rik  | -2.435      | -1.860 | 1.279 |
| A_52_P190506  | Mus musculus NCD-derived CD11c <sup>hi</sup> v6 dendritic cells cDNA, RIKEN full-length enriched library, clone F630108O13 product/mitochondrial ribosomal protein L15, full insert sequence. [AK154840]                                                      | AK154840         | AK154840       | -2.427      | -1.564 | 1.262 |
| A_52_P315942  | me1hph (mev)=viable mothair/femalotopic cell protein-tyrosine phosphatase (insertion) [mice, mRNA Partial Mutant, 120 nt] [S63793]                                                                                                                            | SE3763           | Ptpn6          | -2.426      | -1.769 | 1.188 |
| A_52_P315631  | Mus musculus ubiquitin carboxyl-terminal esterase L4 (Uch4), mRNA [NM_033607]                                                                                                                                                                                 | NM_033607        | Uch4           | -2.420      | -1.786 | 1.451 |
| A_52_P537050  | Mus musculus ubiquitin carboxyl-terminal esterase L3 (ubiquitin thiolesterase) (Uch3), mRNA [NM_016723]                                                                                                                                                       | NM_016723        | Uch3           | -2.418      | -1.896 | 1.874 |
| A_51_P280397  | Mus musculus annexin A11 (Anxa11), mRNA [NM_013469]                                                                                                                                                                                                           | NM_013469        | Anxa11         | -2.391      | -1.542 | 2.363 |
| A_52_P198727  | Mus musculus RIKEN cDNA 1810043G02 gene (1810043G02Rik), mRNA [NM_026431]                                                                                                                                                                                     | NM_026431        | 1810043G02Rik  | -2.382      | -1.687 | 1.493 |
| A_51_P409101  | Mus musculus adult male testis cDNA, RIKEN full-length enriched library, clone 1700021K114 product/hypothetical Cadherin structure containing protein, full insert sequence. [AK006216]                                                                       | AK006216         | 1700021K114Rik | -2.373      | -1.878 | 1.836 |
| A_51_P486289  | Mus musculus DNA segment, Chr 5, ERATO Doi 679, expressed (DSEr6579e), mRNA [NM_001081232]                                                                                                                                                                    | NM_001081232     | DSEr6579e      | -2.366      | -1.548 | 1.548 |
| A_52_P1164289 | Mus musculus 9 days neonate thymus cDNA, RIKEN full-length enriched library, clone A630501F11 product/unclassifiable, full insert sequence. [AK042129]                                                                                                        | AK042129         | A630501F11     | -2.361      | -2.023 | 1.582 |
| A_51_P433562  | Mus musculus non-metastatic cells 7, protein expressed in (Nme7), transcript variant 1, mRNA [NM_138314]                                                                                                                                                      | NM_138314        | Nme7           | -2.343      | -2.043 | 1.570 |
| A_51_P365440  | Mus musculus sema domain, immunoglobulin domain (Ig), transmembrane domain (TM) and short cytoplasmic domain, (semaphorin) 4B (Sema4b), mRNA [NM_013659]                                                                                                      | NM_013659        | Sema4b         | -2.326      | -4.308 | 1.591 |
| A_52_P506529  | Mus musculus RAB GTPase activating protein 1-like (Rabgap1), transcript variant 2, mRNA [NM_001038621]                                                                                                                                                        | NM_001038621     | Rabgap1        | -2.325      | -4.163 | 1.102 |
| A_52_P227659  | Mus musculus 9 days embryo whole body cDNA, RIKEN full-length enriched library, clone DD2078101 product/selectin, endothelial cell, ligand, full insert sequence. [AK050772]                                                                                  | AK050772         | Gna11          | -2.323      | -2.002 | 2.368 |
| A_52_P598912  | Mus musculus ELKS/RAB6-interacting/CASF family member 1 (Erc1), transcript variant 1, mRNA [NM_178085]                                                                                                                                                        | NM_178085        | Erc1           | -2.305      | -3.739 | 2.086 |
| A_52_P438084  | Mus musculus protein kinase C, zeta (Prkcz), transcript variant 1, mRNA [NM_008860]                                                                                                                                                                           | NM_008860        | Prkcz          | -2.300      | -3.429 | 2.215 |
| A_52_P771106  | Mus musculus 13 days embryo heart cDNA, RIKEN full-length enriched library, clone D330030C01 product/unclassifiable, full insert sequence. [AK052335]                                                                                                         | AK052335         | AK052335       | -2.299      | -3.150 | 1.053 |
| A_51_P451588  | Mus musculus protein domain containing family B (evectin) member 1 (Plecth1), mRNA [NM_013746]                                                                                                                                                                | NM_013746        | Plecth1        | -2.287      | -1.491 | 1.197 |
| A_52_P427332  | Mus musculus eyes absent 3 homolog (Drosophila) (Eya3), transcript variant 2, mRNA [NM_010166]                                                                                                                                                                | NM_010166        | Eya3           | -2.272      | -1.490 | 1.643 |
| A_52_P500711  | Mus musculus eyes absent 3 homolog (Drosophila) (Eya3), transcript variant 2, mRNA [NM_010166]                                                                                                                                                                | TC1667915        | TC1667915      | -2.265      | -2.885 | 1.266 |

|               |                                                                                                                                                                                                                        |              |              |        |         |       |
|---------------|------------------------------------------------------------------------------------------------------------------------------------------------------------------------------------------------------------------------|--------------|--------------|--------|---------|-------|
| A_52_P258291  | Mus musculus E26 avian leukemia oncogene 1' 5' domain (Ets1), transcript variant 1, mRNA [NM_011808]                                                                                                                   | NM_011808    | Ets1         | -2.261 | -1.405  | 1.980 |
| A_51_P275496  | Mus musculus cDNA clone IMAGE:5065404 [BC029971]                                                                                                                                                                       | BC029971     | BC026762     | -2.254 | -1.552  | 1.201 |
| A_52_P689397  | Mus musculus cDNA clone IMAGE:5065404 [BC029971]                                                                                                                                                                       | BC029971     | TC1685454    | -2.246 | -2.225  | 1.082 |
| A_52_P564132  | Mus musculus heparan sulfate 2-O-sulfotransferase 1 (Hs2st1), mRNA [NM_011826]                                                                                                                                         | NM_011828    | Hs2st1       | -2.229 | -1.429  | 1.265 |
| A_52_P410449  | Mus musculus interleukin 4 induced 1 (Ili4i), mRNA [NM_010215]                                                                                                                                                         | NM_010215    | Ili4i        | -2.224 | A/P     | 1.182 |
| A_51_P271828  | Mus musculus RIKEN cDNA 2210009G21 gene (2210009G21Rik), transcript variant 1, mRNA [NM_028634]                                                                                                                        | NM_028834    | 2210009G21R  | -2.212 | -1.954  | 1.186 |
| A_51_P263407  | Mus musculus 10 days neonate skin cDNA, RIKEN full-length enriched library, clone 4732469J09 product hypothetical protein, full insert sequence [AK028913]                                                             | AK028913     | 1700041E20R4 | -2.211 | -2.124  | 1.704 |
| A_52_P684050  | Mus musculus RIKEN cDNA 5430432M24 gene (5430432M24Rik), transcript variant 1, mRNA [NM_028666]                                                                                                                        | NM_028666    | 5430432M24R  | -2.209 | -2.427  | 4.972 |
| A_52_P605584  | Mus musculus expressed sequence A1314976 (A1314976), mRNA [NM_207219]                                                                                                                                                  | NM_207219    | A1314976     | -2.205 | -5.144  | 1.439 |
| A_52_P373846  | Mus musculus polycomb group ring finger 3 (Pcgf3), mRNA [NM_172716]                                                                                                                                                    | NM_172716    | Pcgf3        | -2.205 | -2.679  | 4.040 |
| A_52_P360227  | Mus musculus fibro granule nucleotide exchange factor (GEF) 12 (Arhgef12), mRNA [NM_027144]                                                                                                                            | NM_027144    | Arhgef12     | -2.198 | -1.629  | 2.029 |
| A_52_P97690   | Mus musculus poly (ADP-ribose) polymerase family, member 14 (Parp14), mRNA [NM_001039530]                                                                                                                              | NM_001039530 | Parp14       | -2.181 | -1.491  | 3.476 |
| A_52_P120612  | Mus musculus GRB2-related adaptor protein 2 (Grap2), mRNA [NM_010815]                                                                                                                                                  | NM_010815    | Grap2        | -2.173 | A/P     | 1.517 |
| A_52_P123238  | Mus musculus additional sex combs like 1 (Drosophila) (Asx1), mRNA [NM_001039939]                                                                                                                                      | NM_001039939 | Asx1         | -2.169 | -10.717 | 2.011 |
| A_51_P125629  | Mus musculus regulator of G-protein signaling 12 (Rgs12), mRNA [NM_173402]                                                                                                                                             | NM_173402    | Rgs12        | -2.169 | -2.309  | 2.448 |
| A_52_P402394  | Mus musculus transmembrane protein 121 (Tmem121), mRNA [NM_153776]                                                                                                                                                     | NM_153776    | Tmem121      | -2.145 | -2.160  | 2.205 |
| A_52_P327971  | Mus musculus checkpoint with forkhead and ring finger domains (Chfr), mRNA [NM_172717]                                                                                                                                 | NM_172717    | Chfr         | -2.145 | -2.065  | 4.746 |
| A_52_P413847  | Mus musculus 5,10-methylene tetrahydrofolate reductase (Mthfr), mRNA [NM_010840]                                                                                                                                       | NM_010840    | Mthfr        | -2.145 | -1.574  | 1.387 |
| A_52_P284658  | Mus musculus DNA segment, Chr 11, ERA10 Do-497, expressed (D11Erat0497e), mRNA [NM_029976]                                                                                                                             | NM_029976    | D11Erat0497e | -2.135 | -1.975  | 2.307 |
| A_52_P6994    | Mus musculus helicase (DNA B) (Helb), mRNA [NM_080446]                                                                                                                                                                 | NM_080446    | Helb         | -2.130 | -1.439  | 1.619 |
| A_52_P81928   | Mus musculus Smg-5 homolog, nonsense mediated mRNA decay factor (C. elegans) (Smg5), mRNA [NM_178246]                                                                                                                  | NM_178246    | Smg5         | -2.125 | -2.673  | 1.160 |
| A_52_P470316  | Mus musculus lysosomal-associated protein transmembrane 4B (Laptm4b), mRNA [NM_033521]                                                                                                                                 | NM_033521    | Laptm4b      | -2.124 | -1.452  | 1.180 |
| A_51_P140690  | Mus musculus stathmin-like 3 (Stmn3), mRNA [NM_099133]                                                                                                                                                                 | NM_099133    | Stmn3        | -2.122 | 3-A/P   | 1.254 |
| A_52_P81119   | Mus musculus myeloid-associated differentiation marker (Myadm), mRNA [NM_016969]                                                                                                                                       | NM_016969    | Myadm        | -2.108 | -2.281  | 1.356 |
| A_52_P683441  | Mus musculus calpain 5 (Capn5), mRNA [NM_007602]                                                                                                                                                                       | NM_007602    | Capn5        | -2.107 | -2.163  | 1.129 |
| A_51_P437289  | Mus musculus cDNA sequence BC017612 (BC017612), mRNA [NM_133214]                                                                                                                                                       | NM_133214    | BC017612     | -2.102 | -1.511  | 1.207 |
| A_52_P506598  | Mus musculus RIKEN cDNA A530025D01Rik gene (A530025D01Rik), mRNA [NM_178762]                                                                                                                                           | NM_178762    | A530025D01R  | -2.082 | -2.682  | 2.252 |
| A_51_P170641  | Mus musculus WD repeat domain 21 (Wdr21), mRNA [NM_030246]                                                                                                                                                             | NM_030246    | Wdr21        | -2.080 | -1.714  | 2.465 |
| A_52_P680693  | Mus musculus dermatan sulfate epimerase-like (Deel), mRNA [NM_001081316]                                                                                                                                               | NM_001081316 | Deel         | -2.074 | -1.495  | 1.050 |
| A_51_P254302  | Mus musculus ring finger protein 151, mRNA (cDNA clone IMAGE:5401088) [BC053070]                                                                                                                                       | BC053070     | RNF151       | -2.065 | -2.011  | 1.537 |
| A_52_P667817  | Mus musculus 16 days embryo head cDNA, RIKEN full-length enriched library, clone C130070A06 product mitogen activated protein kinase 8, full insert sequence [AK163829]                                                | AK163829     | Mapk8        | -2.050 | -3.507  | 2.130 |
| A_51_P215530  | Mus musculus bone marrow macrophage cDNA, RIKEN full-length enriched library, clone:1830028M19 product hypothetical Zn-finger, RING/Zinc finger RING-type profile containing protein, full insert sequence, [AK151379] | AK151379     | Rnf180       | -2.050 | -5.529  | 1.439 |
| A_52_P278103  | Mus musculus Stam binding protein (Stambp), mRNA [NM_024239]                                                                                                                                                           | NM_024239    | Stambp       | -2.045 | -1.571  | 1.834 |
| A_51_P111259  | Mus musculus CK2-associated protein 2 (Ckap2), mRNA [NM_028333]                                                                                                                                                        | NM_028333    | Ckap2        | -2.040 | -2.867  | 1.663 |
| A_52_P244908  | Mus musculus adult male thymus cDNA, RIKEN full-length enriched library, clone:5830488H16 product unclassifiable, full insert sequence [AK031010]                                                                      | AK031010     | AK031010     | -2.035 | -3.283  | 2.405 |
| A_52_P110689  | Mus musculus origin recognition complex, subunit 3-like (S. cerevisiae) (Orc3), mRNA [NM_015824]                                                                                                                       | NM_015824    | Orc3         | -2.030 | -1.843  | 2.382 |
| A_51_P480046  | Mus musculus ectonucleoside triphosphate diphosphohydrolase 5 (Ectpd5), transcript variant 1, mRNA [NM_007647]                                                                                                         | NM_007647    | Ectpd5       | -2.026 | -1.418  | 2.937 |
| A_52_P651371  | Mus musculus asparagine-linked glycosylation 1 homolog (yeast, alpha-1,3-galactosyltransferase) (A1gtb), mRNA [NM_199035]                                                                                              | NM_199035    | A1gtb        | -2.025 | -1.426  | 3.218 |
| A_51_P367772  | Mus musculus PAP associated domain containing 1 (Papd1), mRNA [NM_026157]                                                                                                                                              | NM_026157    | Papd1        | -2.023 | -3.038  | 1.221 |
| A_52_P358138  | MMANBD1 Mus musculus lysosomal alpha-mannosidase (Man2b) gene, exon 1 [AF044174]                                                                                                                                       | AF044174     | AF044174     | -2.022 | -1.456  | 3.122 |
| A_51_P111018  | Mus musculus HEAT repeat containing 5B (Heat5b), mRNA [NM_001081179]                                                                                                                                                   | NM_001081179 | Heat5b       | -2.020 | -2.524  | 3.408 |
| A_51_P260132  | Mus musculus ring finger protein F3b (Rnf3b), mRNA [NM_026294]                                                                                                                                                         | NM_026294    | Rnf3b        | -2.000 | -3.893  | 1.217 |
| A_51_P342535  | Mus musculus ring finger protein 166 (Rnf166), mRNA [NM_001033142]                                                                                                                                                     | NM_001033142 | Rnf166       | -2.000 | -1.837  | 1.448 |
| A_51_P266847  | Mus musculus ring finger protein 126 (Rnf126), mRNA [NM_144528]                                                                                                                                                        | NM_144528    | Rnf126       | -2.000 | -6.187  | 2.548 |
| A_52_P602771  | Mus musculus serine/arginine-rich protein specific kinase 2 (Sprk2), mRNA [NM_009274]                                                                                                                                  | NM_009274    | Sprk2        | -1.996 | -3.925  | 1.524 |
| A_52_P265945  | Mus musculus 12 days embryo eyeball cDNA, RIKEN full-length enriched library, clone D230026F01 product unclassifiable, full insert sequence, [AK142083]                                                                | AK142083     | AK142083     | -1.985 | -1.801  | 1.664 |
| A_51_P380527  | Mus musculus RIKEN cDNA 4631427C17Rik gene (4631427C17Rik), mRNA [NM_021414]                                                                                                                                           | NM_021414    | 4631427C17R  | -1.978 | -1.420  | 1.660 |
| A_52_P505827  | Mus musculus cytochrome b5 reductase 4 (Cyb5r4), mRNA [NM_024195]                                                                                                                                                      | NM_024195    | Cyb5r4       | -1.969 | -1.626  | 1.505 |
| A_52_P50603   | Mus musculus 16 days neonate thymus cDNA, RIKEN full-length enriched library, clone A130026F16 product IL-2-inducible T-cell kinase, full insert sequence, [AK037554]                                                  | AK037554     | Itk          | -1.969 | -1.947  | 2.014 |
| A_51_P151011  | Mus musculus homer homolog 1 (Drosophila) (Homer1), transcript variant d, mRNA [NM_152134]                                                                                                                             | NM_152134    | Homer1       | -1.966 | -1.974  | 2.463 |
| A_51_P486308  | Mus musculus RIKEN cDNA 4930473A06Rik gene (4930473A06Rik), mRNA [NM_001081012]                                                                                                                                        | NM_001081012 | 4930473A06R  | -1.961 | -1.826  | 1.036 |
| A_52_P239381  | Mus musculus 12 days embryo embryonic body between diaphragm region and neck cDNA, RIKEN full-length enriched library, clone 9430032H24 product unclassifiable, full insert sequence, [AK034763]                       | AK034763     | E330009E22R  | -1.954 | -1.667  | 1.458 |
| A_51_P562913  | Mus musculus ADP-ribosylation factor GTPase activating protein 3 (Arfgap3), mRNA [NM_025445]                                                                                                                           | NM_025445    | Arfgap3      | -1.937 | -1.726  | 1.272 |
| A_51_P200083  | Mus musculus glutamate receptor, ionotropic, N-methyl D-aspartate-associated protein 1 (Glutamate binding) (Grina), mRNA [NM_023168]                                                                                   | NM_023168    | Grina        | -1.935 | -1.869  | 1.141 |
| A_51_P266546  | Mus musculus RIKEN cDNA 3110050N22Rik gene (3110050N22Rik), mRNA [NM_173181]                                                                                                                                           | NM_173181    | 3110050N22R  | -1.931 | -2.051  | 1.013 |
| A_52_P394175  |                                                                                                                                                                                                                        |              | NAP123168-1  | -1.930 | -3.059  | 1.867 |
| A_52_P405177  | Mus musculus C1a and tumor necrosis factor related protein 6 (C1qrf6), mRNA [NM_028331]                                                                                                                                | NM_028331    | C1qrf6       | -1.918 | -2.229  | 1.164 |
| A_52_P110257  | Mus musculus RIKEN cDNA 1500041N16Rik gene (1500041N16Rik), mRNA [NM_026399]                                                                                                                                           | NM_026399    | 1500041N16R  | -1.917 | -1.518  | 1.397 |
| A_51_P199552  | Mus musculus RIKEN cDNA 1600014C10Rik gene (1600014C10Rik), transcript variant 2, mRNA [NM_028166]                                                                                                                     | NM_028166    | 1600014C10R  | -1.905 | -2.116  | 1.332 |
| A_51_P153982  | Mus musculus sperm antigen with calponin homology and coiled-coil domains 1 (Specc1), mRNA [NM_001029936]                                                                                                              | NM_001029936 | Specc1       | -1.899 | -1.484  | 2.360 |
| A_52_P15166   |                                                                                                                                                                                                                        |              | NAP106285-1  | -1.891 | A/P     | 4.004 |
| A_52_P126158  | Mus musculus immunin-related GTPase family, M (Irgm), mRNA [NM_008326]                                                                                                                                                 | NM_008326    | Irgm         | -1.889 | -1.400  | 2.277 |
| A_51_P183940  | Mus musculus serine/threonine kinase 39, STE20/SPS1 homolog (Sik39), mRNA [NM_016866]                                                                                                                                  | NM_016866    | Sik39        | -1.886 | -2.537  | 1.622 |
| A_51_P230799  | Mus musculus AT-Pase, Ca++ transporting, plasma membrane 1 (Atp2b1), mRNA [NM_026482]                                                                                                                                  | NM_026482    | Atp2b1       | -1.885 | -1.586  | 2.285 |
| A_52_P522754  | Mus musculus transforming protein 2 (Ebnat2p), mRNA [NM_029932]                                                                                                                                                        | NM_029932    | Ebnat2p      | -1.885 | -2.341  | 1.088 |
| A_51_P211903  | Mus musculus golgi autoantigen, golgin subfamily a, 5 (Golga5), mRNA [NM_013747]                                                                                                                                       | NM_013747    | Golga5       | -1.881 | -1.437  | 1.292 |
| A_51_P284730  | Mus musculus adult male colon cDNA, RIKEN full-length enriched library, clone 9030418K01 product unclassifiable, full insert sequence [AK018518]                                                                       | AK018518     | 9030418K01R  | -1.880 | -1.401  | 1.223 |
| A_52_P640484  | Mus musculus tripartite motif protein 21 (Trim21), transcript variant 1, mRNA [NM_009277]                                                                                                                              | NM_009277    | Trim21       | -1.869 | -2.210  | 1.027 |
| A_52_P632191  | Mus musculus nuclear transcription factor 2, box b binding 1 (Nfix), mRNA [NM_023139]                                                                                                                                  | NM_023139    | Nfix         | -1.868 | -1.895  | 1.095 |
| A_51_P472901  | Mus musculus solute carrier family 3 (activators of dibasic and neutral amino acid transport), member 2 (Slc3a2), mRNA [NM_008577]                                                                                     | NM_008577    | Slc3a2       | -1.859 | -1.597  | 1.173 |
| A_52_P349298  | Mus musculus RIKEN cDNA 2610304G08Rik gene (2610304G08Rik), mRNA [NM_027434]                                                                                                                                           | NM_027434    | 2610304G08R  | -1.857 | -2.990  | 3.305 |
| A_51_P273639  | Mus musculus solute carrier family 7 (cationic amino acid transporter, +/- system), member 5 (Slc7a5), mRNA [NM_011404]                                                                                                | NM_011404    | Slc7a5       | -1.854 | -2.747  | 1.447 |
| A_51_P260336  | Mus musculus phospholipase C, beta 2 (Pkcbl2), mRNA [NM_177568]                                                                                                                                                        | NM_177568    | Pkcbl2       | -1.836 | -2.424  | 1.064 |
| A_51_P270146  | Mus musculus cyclin H (Cohh), mRNA [NM_023243]                                                                                                                                                                         | NM_023243    | Cohh         | -1.833 | -3.706  | 2.471 |
| A_52_P341373  | Mus musculus SLAIN motif family, member 1 (Slain1), mRNA [NM_198014]                                                                                                                                                   | NM_198014    | Slain1       | -1.833 | -2.706  | 2.929 |
| A_51_P421876  | Mus musculus interferon regulatory factor 7 (Irf7), mRNA [NM_016580]                                                                                                                                                   | NM_016580    | Irf7         | -1.828 | -2.002  | 1.041 |
| A_51_P413461  | Mus musculus poly (ADP-ribose) glycohydrolase (parp), mRNA [NM_011960]                                                                                                                                                 | NM_011960    | Parp         | -1.827 | -1.746  | 1.024 |
| A_51_P370050  | Mus musculus N-acetylglucosamine-1-phosphodiester alpha-N-acetylglucosaminidase (Nagpa), mRNA [NM_013796]                                                                                                              | NM_013796    | Nagpa        | -1.827 | -1.571  | 1.050 |
| A_51_P289796  | Mus musculus ADP-ribosylation factor-like 4C (Ar4c), mRNA [NM_177305]                                                                                                                                                  | NM_177305    | Ar4c         | -1.826 | -3.119  | 2.334 |
| A_51_P496804  | Mus musculus deaminase domain containing 1 (Deadc1), mRNA [NM_025748]                                                                                                                                                  | NM_025748    | Deadc1       | -1.813 | -1.613  | 1.533 |
| A_52_P1440260 | Mus musculus 5 days neonate thymus cDNA, RIKEN full-length enriched library, clone A630028B08 product unclassifiable, full insert sequence, [AK041653]                                                                 | AK041653     | Si1          | -1.810 | -3.447  | 1.810 |
| A_52_P1083688 | Mus musculus adult male dienecephalon cDNA, RIKEN full-length enriched library, clone 9330184N06 product unclassifiable, full insert sequence, [AK034379]                                                              | AK034379     | AK034379     | -1.809 | -1.775  | 6.558 |
| A_52_P328249  | Mus musculus 12 days embryo spinal cord cDNA, RIKEN full-length enriched library, clone C530045D03 product pyruvate kinase 3, full insert sequence, [AK083076]                                                         | AK083076     | Pkm2         | -1.802 | -1.839  | 1.052 |
| A_51_P130628  | Mus musculus enolase 2, gamma neuronal (Eno2), mRNA [NM_013609]                                                                                                                                                        | NM_013609    | Eno2         | -1.798 | -1.864  | 1.278 |
| A_51_P336927  | Mus musculus cytochrome b5 type B (Cyb5b), mRNA [NM_025658]                                                                                                                                                            | NM_025658    | Cyb5b        | -1.796 | -2.006  | 1.022 |
| A_51_P218612  | Mus musculus 16 days neonate thymus cDNA, RIKEN full-length enriched library, clone A130029B16 product 5-methyltetrahydrofolate-homocysteine methyltransferase, full insert sequence, [AK037599]                       | AK037599     | Mtr          | -1.795 | -1.601  | 1.038 |
| A_52_P69392   |                                                                                                                                                                                                                        |              | NAP037484-1  | -1.792 | -1.439  | 2.935 |
| A_52_P594474  | Mus musculus cyclin L1 (Ccnl1), mRNA [NM_019937]                                                                                                                                                                       | NM_019937    | Ccnl1        | -1.789 | A/P     | 1.276 |
| A_51_P450573  | Mus musculus transforming growth factor, beta receptor II (Tgfb2r2), transcript variant 1, mRNA [NM_009371]                                                                                                            | NM_009371    | Tgfb2r2      | -1.786 | -2.206  | 1.671 |
| A_52_P87229   | G6LUX67_HUMAN (G6LUX67) ALRH2998, partial (47%) [TC1619366]                                                                                                                                                            | TC1619366    | TC1619366    | -1.781 | -5.249  | 5.279 |
| A_52_P395397  | Mus musculus alanyl-tRNA synthetase (Aars), mRNA [NM_146217]                                                                                                                                                           | NM_146217    | Aars         | -1.781 | -2.416  | 1.963 |
| A_52_P9768    | Mus musculus phosphatase type 2 domain containing 2 (Ppapdc2), mRNA [NM_028922]                                                                                                                                        | NM_028922    | Ppapdc2      | -1.779 | -1.874  | 1.565 |
| A_51_P118024  | Mus musculus tripartite motif-containing 65 (Trim65), mRNA [NM_178802]                                                                                                                                                 | NM_178802    | Trim65       | -1.779 | -2.640  | 1.389 |
| A_52_P407022  | Mus musculus RAB5B, member RAS oncogene family (Rab5b), mRNA [NM_177411]                                                                                                                                               | NM_177411    | Rab5b        | -1.771 | -1.801  | 1.222 |

|               |                                                                                                                                                                                                                                                   |                     |              |               |        |        |        |
|---------------|---------------------------------------------------------------------------------------------------------------------------------------------------------------------------------------------------------------------------------------------------|---------------------|--------------|---------------|--------|--------|--------|
| A_52_P9260    | Mus musculus expressed sequence AA536717 (AA536717), transcript variant 1                                                                                                                                                                         | mRNA [NM_001024512] | NM_001024512 | AA536717      | -1.755 | -6.633 | 2.452  |
| A_52_P331212  | Mus musculus centrosome and spindle pole associated protein 1 (Csppt1), mRNA [NM_026493]                                                                                                                                                          | mRNA [NM_026493]    | NM_026493    | Csppt1        | -1.755 | -1.711 | 1.131  |
| A_52_P603184  | Mus musculus suppressor of fused homolog (Drosophila) (Sufu), transcript variant 1                                                                                                                                                                | mRNA [NM_015752]    | NM_015752    | Sufu          | -1.751 | -2.368 | 3.342  |
| A_52_P628067  | Mus musculus cell division cycle associated 3 (Cdc3a3), mRNA [NM_013538]                                                                                                                                                                          | mRNA [NM_013538]    | NM_013538    | Cdc3a3        | -1.750 | -2.534 | 4.408  |
| A_51_P350259  | Mus musculus sperm associated antigen 9 (Spag9), transcript variant 1                                                                                                                                                                             | mRNA [NM_027569]    | NM_027569    | Spag9         | -1.750 | -2.550 | 1.814  |
| A_51_P382500  | Mus musculus adult male brain UNDEFINED_CELL_LINE cDNA, RIKEN full-length enriched library, clone MSC1079K13 product: Hypothetical AMP-dependent synthetase and ligase containing protein homolog (Mus musculus), full insert sequence [AK147562] | mRNA [NM_029662]    | AK147562     | Dip2b         | -1.740 | -2.680 | 1.960  |
| A_52_P2714126 | Mus musculus arachidonate 5-lipoxygenase (Alox5), mRNA [NM_009662]                                                                                                                                                                                | mRNA [NM_009662]    | NM_009662    | Alox5         | -1.736 | -3.503 | 1.153  |
| A_51_P127279  | Mus musculus RIKEN cDNA 4930504E06 gene (4930504E06Rik), mRNA [NM_133858]                                                                                                                                                                         | mRNA [NM_133858]    | NM_133858    | 4930504E06Rik | -1.736 | -1.936 | 1.320  |
| A_51_P391825  | Mus musculus exosome component 10 (Exosc10), mRNA [NM_016699]                                                                                                                                                                                     | mRNA [NM_016699]    | NM_016699    | Exosc10       | -1.725 | -1.468 | 1.204  |
| A_52_P605122  | Ras and Rab interactor 2 [Source:MarkerSymbol; Acc:MGJ_1921280] [ENSMUST00000017473]                                                                                                                                                              | mRNA [NM_030241]    | NM_030241    | Rim2          | -1.723 | -3.404 | 1.117  |
| A_52_P181468  | Mus musculus SET domain containing (lysine methyltransferase) B (Setdb9), mRNA [NM_030241]                                                                                                                                                        | mRNA [NM_030241]    | NM_030241    | Setdb9        | -1.719 | -1.445 | 1.419  |
| A_52_P366980  | Mus musculus tetraspanin 17 (Tspan17), mRNA [NM_028841]                                                                                                                                                                                           | mRNA [NM_028841]    | NM_028841    | Tspan17       | -1.718 | -2.162 | 1.495  |
| A_52_P568781  | Mus musculus cDNA IMAGE:6413001, containing frame-shift errors [BC059816]                                                                                                                                                                         | mRNA [NM_028841]    | BC059816     | Sec3b         | -1.712 | -1.776 | 1.370  |
| A_52_P210333  | Mus musculus FAST kinase domains 5 (Fastk05), mRNA [NM_198176]                                                                                                                                                                                    | mRNA [NM_198176]    | NM_198176    | Fastk05       | -1.711 | -2.299 | 1.303  |
| A_51_P448890  | Mus musculus Dicerone syndrome critical region gene 2 (Dcpr2), mRNA [NM_010048]                                                                                                                                                                   | mRNA [NM_010048]    | NM_010048    | Dcpr2         | -1.710 | -2.777 | 4.362  |
| A_51_P450123  | Mus musculus mitochondrial ribosomal protein L36 (Mrpl36), mRNA [NM_053163]                                                                                                                                                                       | mRNA [NM_053163]    | NM_053163    | Mrpl36        | -1.709 | -1.676 | 1.334  |
| A_52_P287492  | Mus musculus zinc finger, DHHC domain containing 13 (Zdhhc13), mRNA [NM_028031]                                                                                                                                                                   | mRNA [NM_028031]    | NM_028031    | Zdhhc13       | -1.708 | -2.138 | 1.521  |
| A_52_P69756   | Mus musculus M1ERF domain containing 2 (Mterf2), mRNA [NM_178051]                                                                                                                                                                                 | mRNA [NM_178051]    | NM_178051    | Mterf2        | -1.703 | -1.925 | 1.296  |
| A_51_P170050  | Mus musculus zinc finger protein 245 (Zfp245), mRNA [NM_028335]                                                                                                                                                                                   | mRNA [NM_028335]    | NM_028335    | Zfp245        | -1.702 | -1.646 | 1.350  |
| A_52_P154005  | Mus musculus zinc finger and BTB domain containing 11, mRNA (cDNA clone IMAGE:6485438) [BC055403]                                                                                                                                                 | mRNA [NM_028335]    | BC055403     | Zfpb11        | -1.701 | -3.922 | 1.684  |
| A_52_P214624  | Mus musculus adult male colon cDNA, RIKEN full-length enriched library, clone 9030207G08 product: inferred: RIKEN cDNA 443240J10 gene, full insert sequence [AK033450]                                                                            | mRNA [NM_011854]    | AK033450     | Gapv1         | -1.700 | -1.564 | 2.015  |
| A_51_P387123  | Mus musculus 2-5 oligonucleotide synthetase-like 2 (Cas2), mRNA [NM_011854]                                                                                                                                                                       | mRNA [NM_011854]    | NM_011854    | Cas2          | -1.694 | -1.846 | 1.724  |
| A_52_P311205  | Mus musculus 6-phosphofructo-2-kinase/fructose 2,6-bisphosphatase 2, mRNA (cDNA clone MGC:25723 IMAGE:3979400), complete cds. [BC018418]                                                                                                          | mRNA [NM_013677]    | BC018418     | Pfkfb2        | -1.692 | -1.604 | 1.017  |
| A_51_P332602  | Mus musculus surfact protein 1 (Surf1), mRNA [NM_013677]                                                                                                                                                                                          | mRNA [NM_013677]    | NM_013677    | Surf1         | -1.690 | -1.909 | 2.370  |
| A_51_P517157  | Mus musculus transmembrane protein 43 (Tmem43), mRNA [NM_028766]                                                                                                                                                                                  | mRNA [NM_028766]    | NM_028766    | Tmem43        | -1.690 | -2.518 | 1.344  |
| A_52_P681659  | Mus musculus microtubule-associated protein 9 (Map9b), mRNA [NM_001081230]                                                                                                                                                                        | mRNA [NM_001081230] | NM_001081230 | Map9b         | -1.687 | -1.479 | 1.153  |
| A_52_P269442  | Mus musculus carmine palmitoyltransferase 1c (Carp1c), mRNA [NM_163678]                                                                                                                                                                           | mRNA [NM_163678]    | NM_163678    | Carp1c        | -1.683 | -4.631 | 1.013  |
| A_52_P376290  | Mus musculus early endosome antigen 1 (Eea1), mRNA [NM_001001932]                                                                                                                                                                                 | mRNA [NM_001001932] | NM_001001932 | Eea1          | -1.679 | -1.431 | 1.413  |
| A_52_P299832  | Mus musculus plexin C1 (Plnc1), mRNA [NM_018797]                                                                                                                                                                                                  | mRNA [NM_018797]    | NM_018797    | Plnc1         | -1.679 | -1.963 | 2.109  |
| A_52_P521216  | Mus musculus CCAT1enhancer binding protein (CebpE), gamma (Cebpg), mRNA [NM_009884]                                                                                                                                                               | mRNA [NM_009884]    | NM_009884    | Cebpg         | -1.676 | -2.120 | 1.184  |
| A_52_P473544  | Mus musculus septin 6, mRNA (cDNA clone MGC:19033 IMAGE:4168214), complete cds. [BC010489]                                                                                                                                                        | mRNA [NM_021542]    | BC010489     | Sept6         | -1.673 | -1.535 | 1.357  |
| A_51_P267861  | Mus musculus potassium channel, subfamily K, member 5 (Kcnk5), mRNA [NM_021542]                                                                                                                                                                   | mRNA [NM_021542]    | NM_021542    | Kcnk5         | -1.672 | -2.351 | 1.907  |
| A_52_P681488  | Mus musculus syntaxin 17 (Stx17), mRNA [NM_026343]                                                                                                                                                                                                | mRNA [NM_026343]    | NM_026343    | Stx17         | -1.670 | -1.945 | 1.777  |
| A_52_P271208  | Mus musculus angiotensin II, type 1 receptor-associated protein (Atrap), mRNA [NM_009642]                                                                                                                                                         | mRNA [NM_009642]    | NM_009642    | Atrap         | -1.661 | -2.691 | 3.452  |
| A_51_P300726  | Mus musculus opioid receptor, sigma 1 (Oprn1), mRNA [NM_011014]                                                                                                                                                                                   | mRNA [NM_011014]    | NM_011014    | Oprn1         | -1.660 | -2.042 | 1.405  |
| A_51_P424959  | Mus musculus B-cell CLL/lymphoma 6, member B (Bcl6b), mRNA [NM_007528]                                                                                                                                                                            | mRNA [NM_007528]    | NM_007528    | Bcl6b         | -1.657 | -3.070 | 1.568  |
| A_52_P251425  | Mus musculus RIKEN cDNA D030074E01 gene (D030074E01Rik), mRNA [NM_029491]                                                                                                                                                                         | mRNA [NM_029491]    | NM_029491    | D030074E01Rik | -1.654 | -1.582 | 2.289  |
| A_51_P297033  | Mus musculus tyrosylase domain containing 13 (Ahrb13), mRNA [NM_001081119]                                                                                                                                                                        | mRNA [NM_001081119] | NM_001081119 | Ahrb13        | -1.651 | -1.932 | 1.611  |
| A_52_P507305  | Mus musculus isoamyl acetate-hydrolyzing esterase 1 homolog (S. cerevisiae) (Iah1), mRNA [NM_028347]                                                                                                                                              | mRNA [NM_028347]    | NM_028347    | Iah1          | -1.645 | -1.789 | 1.581  |
| A_51_P292073  | Mus musculus hydroxyacylglutathione hydrolase-like (Haghl), mRNA [NM_026897]                                                                                                                                                                      | mRNA [NM_026897]    | NM_026897    | Haghl         | -1.643 | -1.678 | 1.091  |
| A_51_P152892  | Mus musculus 12 days embryo eyefield cDNA, RIKEN full-length enriched library, clone D230005F18 product: CD3 antigen, zeta protein sequence. [AK051825]                                                                                           | mRNA [AK051825]     | AK051825     | AK051825      | -1.639 | -1.913 | 1.266  |
| A_52_P469528  | Mus musculus pleckstrin and Sec7 domain containing 3 (Psd3), transcript variant 1, mRNA [NM_003258]                                                                                                                                               | mRNA [NM_003258]    | NM_003258    | Psd3          | -1.637 | -1.523 | 1.087  |
| A_52_P890701  | Mus musculus mRNA for mKIAA0675 protein [AK122344]                                                                                                                                                                                                | mRNA [AK122344]     | AK122344     | 2310047C04Rik | -1.631 | -1.447 | 1.008  |
| A_52_P27864   | Mus musculus sarco glycican, epsilon (Sgce), mRNA [NM_011360]                                                                                                                                                                                     | mRNA [NM_011360]    | NM_011360    | Sgce          | -1.629 | -1.459 | 1.222  |
| A_51_P430014  | Mus musculus platelet-activating factor receptor (Paf1r), mRNA [NM_001081211]                                                                                                                                                                     | mRNA [NM_001081211] | NM_001081211 | Paf1r         | -1.627 | -2.236 | 1.953  |
| A_52_P432449  | Mus musculus located early in transport 1 homolog (S. cerevisiae) (Bet1), mRNA [NM_009748]                                                                                                                                                        | mRNA [NM_009748]    | NM_009748    | Bet1          | -1.626 | -1.626 | 1.721  |
| A_52_P510877  | Mus musculus Bcl2-like 1 (Bcl2l1), mRNA [NM_009743]                                                                                                                                                                                               | mRNA [NM_009743]    | NM_009743    | Bcl2l1        | -1.624 | -1.585 | 1.777  |
| A_52_P747190  | Mus musculus 10 day neonate thymus cDNA, RIKEN full-length enriched library, clone A430091K09 product: unclassifiable, full insert sequence. [AK040400]                                                                                           | mRNA [AK040400]     | AK040400     | AK040400      | -1.622 | -1.778 | 12.101 |
| A_52_P228107  | Mus musculus CWF19-like 1, cell cycle control (S. pombe) (Cwf19l1), mRNA [NM_001081077]                                                                                                                                                           | mRNA [NM_001081077] | NM_001081077 | Cwf19l1       | -1.616 | -1.522 | 1.464  |
| A_51_P461219  | Mus musculus coenzyme Q4 homolog (yeast) (Cco4), mRNA [NM_178693]                                                                                                                                                                                 | mRNA [NM_178693]    | NM_178693    | Cco4          | -1.614 | -1.614 | 1.087  |
| A_52_P254174  | Mus musculus nuclear receptor subfamily 3, group C, member 1 (Nr3c1), mRNA [NM_008173]                                                                                                                                                            | mRNA [NM_008173]    | NM_008173    | Nr3c1         | -1.611 | -1.958 | 1.292  |
| A_52_P569240  | Mus musculus NACHT and WD repeat domain containing 1 (Nwd1), mRNA [NM_176940]                                                                                                                                                                     | mRNA [NM_176940]    | NM_176940    | Nwd1          | -1.611 | -1.732 | 1.008  |
| A_52_P291428  | Mus musculus RIKEN cDNA 1709001E04 gene (1709001E04Rik), mRNA [NM_029288]                                                                                                                                                                         | mRNA [NM_029288]    | NM_029288    | 1709001E04Rik | -1.611 | -1.522 | 1.507  |
| A_52_P514352  | Mus musculus potassium channel, subfamily K, member 5 (Kcnk5), mRNA [NM_021542]                                                                                                                                                                   | mRNA [NM_021542]    | NM_021542    | Kcnk5         | -1.611 | -1.585 | 1.035  |
| A_52_P302629  | M. musculus partial cochlear mRNA (clone 49F5) [Z78155]                                                                                                                                                                                           | mRNA [Z78155]       | Z78155       | Z78155        | -1.610 | -2.583 | 1.354  |
| A_51_P217369  | Mus musculus TEL2, telomere maintenance 2, homolog (S. cerevisiae) (Tel2), mRNA [NM_027880]                                                                                                                                                       | mRNA [NM_027880]    | NM_027880    | Tel2          | -1.609 | -2.144 | 1.134  |
| A_52_P423021  | Mus musculus zinc finger protein 654 (Zfp654), mRNA [NM_028059]                                                                                                                                                                                   | mRNA [NM_028059]    | NM_028059    | Zfp654        | -1.608 | -2.313 | 1.611  |
| A_51_P301052  | Mus musculus RIKEN cDNA 1810008A18 gene (1810008A18Rik), mRNA [NM_133988]                                                                                                                                                                         | mRNA [NM_133988]    | NM_133988    | 1810008A18Rik | -1.608 | -2.786 | 2.000  |
| A_52_P314571  | Mus musculus chitinase domain containing 1 (Chid1), mRNA [NM_026522]                                                                                                                                                                              | mRNA [NM_026522]    | NM_026522    | Chid1         | -1.607 | -1.791 | 1.470  |
| A_51_P126835  | Mus musculus RIKEN cDNA 2700007P21 gene (2700007P21Rik), transcript variant 2, mRNA [NM_173750]                                                                                                                                                   | mRNA [NM_173750]    | NM_173750    | 2700007P21Rik | -1.606 | -1.638 | 1.248  |
| A_52_P265948  | Mus musculus adult male thymus cDNA, RIKEN full-length enriched library, clone 5830465G10 product: hypothetical protein, full insert sequence [AK134157]                                                                                          | mRNA [AK134157]     | AK134157     | 5033406C09Rik | -1.606 | -1.497 | 1.735  |
| A_52_P467438  | Mus musculus 2 days pregnant adult female ovary cDNA, RIKEN full-length enriched library, clone E330019I03 product: MiC2 (monoclonal Imperial Cancer Research Fund 2)-like 1, full insert sequence. [AK054394]                                    | mRNA [AK054394]     | AK054394     | C9992         | -1.601 | -1.513 | 6.654  |
| A_52_P507368  | Mus musculus glutathione S-transferase, C-terminal domain containing (Gatcd), mRNA [NM_026231]                                                                                                                                                    | mRNA [NM_026231]    | NM_026231    | Gatcd         | -1.599 | -1.635 | 1.388  |
| A_52_P512877  | Mus musculus adult male bone cDNA, RIKEN full-length enriched library, clone 9830005E11 product: unclassifiable, full insert sequence. [AK036397]                                                                                                 | mRNA [AK036397]     | AK036397     | AK036397      | -1.598 | -4.798 | 2.272  |
| A_51_P272974  | Mus musculus O4, cytoskeletal double PHD fingers family 2 (Odf2), mRNA [NM_011252]                                                                                                                                                                | mRNA [NM_011252]    | NM_011252    | Odf2          | -1.589 | -2.539 | 1.115  |
| A_52_P771228  | Mus musculus 2 days pregnant adult female ovary cDNA, RIKEN full-length enriched library, clone E330010G20 product: unclassifiable, full insert sequence. [AK054284]                                                                              | mRNA [AK054284]     | AK054284     | AK054284      | -1.587 | -1.795 | 1.771  |
| A_51_P362877  | Mus musculus interleukin 21 receptor (Il21r), mRNA [NM_021887]                                                                                                                                                                                    | mRNA [NM_021887]    | NM_021887    | Il21r         | -1.583 | -1.527 | 1.246  |
| A_52_P263970  | Mus musculus CDC23 (cell division cycle 23, yeast homolog) (Cdc23), mRNA [NM_178347]                                                                                                                                                              | mRNA [NM_178347]    | NM_178347    | Cdc23         | -1.577 | -1.946 | 1.611  |
| A_51_P468511  | Mus musculus C/EBP delta, beta-lactam F (Cebpd), member 3 (Cebpd3), mRNA [NM_013852]                                                                                                                                                              | mRNA [NM_013852]    | NM_013852    | Cebpd3        | -1.575 | -1.420 | 1.465  |
| A_52_P588262  | PREDICTED, Mus musculus RIKEN cDNA C730024G19 gene, transcript variant 1 (C730024G19Rik), mRNA [XM_132975]                                                                                                                                        | mRNA [XM_132975]    | XM_132975    | C730024G19Rik | -1.572 | -1.466 | 1.455  |
| A_51_P442838  | Mus musculus RIKEN cDNA 2810422O20 gene (2810422O20Rik), mRNA [NM_027279]                                                                                                                                                                         | mRNA [NM_027279]    | NM_027279    | 2810422O20Rik | -1.572 | -1.609 | 1.207  |
| A_51_P232889  | Mus musculus 16 days neonate thymus cDNA, RIKEN full-length enriched library, clone A130019C19 product: unclassifiable, full insert sequence. [AK037440]                                                                                          | mRNA [AK037440]     | AK037440     | 4933407L21Rik | -1.571 | -1.724 | 1.028  |
| A_51_P413097  | Mus musculus integrator complex subunit 2 (Itih2), mRNA [NM_027421]                                                                                                                                                                               | mRNA [NM_027421]    | NM_027421    | Itih2         | -1.571 | -1.423 | 1.764  |
| A_52_P682456  | Mus musculus 0 day neonate cerebellum cDNA, RIKEN full-length enriched library, clone C230036A21 product: hypothetical protein, full insert sequence. [AK082305]                                                                                  | mRNA [AK082305]     | AK082305     | Pex1          | -1.571 | -1.490 | 1.210  |
| A_52_P438280  | Mus musculus 13 days embryo male testis cDNA, RIKEN full-length enriched library, clone 6030439K11 product: B-cell leukemia/lymphoma 2, full insert sequence. [AK077913]                                                                          | mRNA [AK077913]     | AK077913     | Bcl2          | -1.570 | -2.100 | 1.038  |
| A_51_P347728  | Mus musculus NF11 non-sulfur cluster scaffold homolog (S. cerevisiae) (Nfu1), mRNA [NM_020045]                                                                                                                                                    | mRNA [NM_020045]    | NM_020045    | Nfu1          | -1.570 | -1.894 | 1.230  |
| A_51_P176944  | Mus musculus RIKEN cDNA 2610207I05 gene (2610207I05Rik), transcript variant 2, mRNA [NM_028172]                                                                                                                                                   | mRNA [NM_028172]    | NM_028172    | 2610207I05Rik | -1.569 | -1.475 | 1.033  |
| A_51_P457171  | Mus musculus RIKEN cDNA 2610207I05 gene (2610207I05Rik), mRNA [NM_001031814]                                                                                                                                                                      | mRNA [NM_001031814] | NM_001031814 | 2610207I05Rik | -1.568 | -1.532 | 1.989  |
| A_51_P242027  | Mus musculus tyrosine 3-monoxygenase/tryptophan 5-monoxygenase activation protein, beta polypeptide (Ywhab), mRNA [NM_018753]                                                                                                                     | mRNA [NM_018753]    | NM_018753    | Ywhab         | -1.568 | -1.523 | 1.537  |
| A_52_P299228  | Mus musculus 10 days embryo whole body cDNA, RIKEN full-length enriched library, clone 3428403L07 product: RIKEN cDNA 573046H423 gene, full insert sequence. [AK068033]                                                                           | mRNA [AK068033]     | AK068033     | Etsa1         | -1.568 | -3.160 | 1.832  |
| A_51_P160344  | Mus musculus 13 days embryo head cDNA, RIKEN full-length enriched library, clone 3110013H01 product: hypothetical protein, full insert sequence. [AK014046]                                                                                       | mRNA [AK014046]     | AK014046     | Pfms          | -1.567 | -1.567 | 1.764  |
| A_51_P432504  | Mus musculus phosphate cytidylyltransferase 2, ethanolamine (Pcyt2), mRNA [NM_024229]                                                                                                                                                             | mRNA [NM_024229]    | NM_024229    | Pcyt2         | -1.565 | -1.441 | 1.200  |
| A_52_P300730  | Mus musculus high mobility group AT-hook 2 (Hmgat2), mRNA [NM_010441]                                                                                                                                                                             | mRNA [NM_010441]    | NM_010441    | Hmgat2        | -1.564 | -2.410 | 1.635  |
| A_52_P102650  | Mus musculus death effector domain-containing DNA binding protein 2 (Dedk2), mRNA [NM_207677]                                                                                                                                                     | mRNA [NM_207677]    | NM_207677    | Dedk2         | -1.564 | -1.461 | 1.986  |
| A_52_P202944  | Mus musculus death effector domain-containing DNA binding protein 2 (Dedk2), mRNA [NM_207677]                                                                                                                                                     | mRNA [NM_207677]    | NM_207677    | Dedk2         | -1.563 | -1.417 | 1.048  |
| A_52_P546228  | Mus musculus methyltransferase-like 3 (Mettl3), mRNA [NM_019721]                                                                                                                                                                                  | mRNA [NM_019721]    | NM_019721    | Mettl3        | -1.562 | -2.630 | 1.665  |
| A_52_P306217  | Mus musculus vacuolar protein sorting 13A (yeast) (Vps13a), mRNA [NM_173028]                                                                                                                                                                      | mRNA [NM_173028]    | NM_173028    | Vps13a        | -1.562 | -1.488 | 4.341  |
| A_52_P969353  | Mus musculus amyloid precursor protein 2 (mouse) chromosome 10 candidate 13 (human) (Apo2c13), transcript variant 2, mRNA [NM_001003946]                                                                                                          | mRNA [NM_001003946] | NM_001003946 | Apo2c13       | -1.562 | -2.119 | 1.954  |
| A_51_P228974  | Mus musculus 2-oxoglutarate and iron-dependent oxygenase domain containing 2 (Ogdod2), mRNA [NM_025671]                                                                                                                                           | mRNA [NM_025671]    | NM_025671    | Ogdod2        | -1.557 | -1.976 | 2.594  |
| A_52_P533779  | Mus musculus ankyrin repeat domain 40 (Ankr40), transcript variant 1, mRNA [NM_027799]                                                                                                                                                            | mRNA [NM_027799]    | NM_027       |               |        |        |        |

|              |                                                                                                                                                                                                                                                 |                                                            |                  |               |        |        |       |
|--------------|-------------------------------------------------------------------------------------------------------------------------------------------------------------------------------------------------------------------------------------------------|------------------------------------------------------------|------------------|---------------|--------|--------|-------|
| A_52_P508912 | Mus musculus RIKEN cDNA 4932438A13 gene                                                                                                                                                                                                         | mRNA (cDNA clone IMAGE:30536256), complete cds. [BC079623] | BC079623         | 4932438A13Rik | -1.548 | -1.481 | 1.278 |
| A_51_P170346 | Mus musculus cDNA, RIKEN full-length enriched library, clone.M5C10D117 product weakly similar to YY1 associated protein [Homo sapiens], full insert sequence. [AK147575]                                                                        | AK147575                                                   | 5830417110Rik    | -1.546        | -1.507 | 2.527  |       |
| A_52_P201984 | Mus musculus adult male urinary bladder cDNA, RIKEN full-length enriched library, clone.9330021D23 product weakly similar to MHC CLASS I T7 ANTIGEN (FRAGMENT) [Mus musculus], full insert sequence. [AK035206]                                 | AK035206                                                   | E330021A06Rik    | -1.544        | A/P    | 2.019  |       |
| A_51_P319425 | PREDICTED: Mus musculus UTP20, small subunit (SSU) processome component, homolog (yeast), transcript variant 1 (Utp20), mRNA [NM_125867]                                                                                                        | NM_125867                                                  | Utp20            | -1.542        | -1.467 | 1.597  |       |
| A_52_P168047 | Mus musculus pyruvate dehydrogenase complex, component X (Pdhx), mRNA [NM_175094]                                                                                                                                                               | NM_175094                                                  | Pdhx             | -1.542        | -1.680 | 1.378  |       |
| A_52_P582424 | Mus musculus RIKEN cDNA 9130221H12 gene (9130221H12Rik), mRNA [NM_178400]                                                                                                                                                                       | NM_178400                                                  | 9130221H12Rik    | -1.541        | -1.581 | 6.604  |       |
| A_52_P252258 | Mus musculus mitogen-activated protein kinase 12 (Mapk12), mRNA [NM_013871]                                                                                                                                                                     | NM_013871                                                  | Mapk12           | -1.541        | -2.214 | 1.828  |       |
| A_52_P191468 | Mus musculus ubiquitin family domain containing 1 (Ubfaf1), mRNA [NM_138589]                                                                                                                                                                    | NM_138589                                                  | Ubfaf1           | -1.540        | -1.760 | 1.425  |       |
| A_52_P537566 | Mus musculus centromere protein 1 (Cenp1), mRNA [NM_177150]                                                                                                                                                                                     | NM_177150                                                  | Cenp1            | -1.538        | -1.909 | 1.674  |       |
| A_52_P347248 | Mus musculus cDNA sequence BC039093 (BC039093), mRNA [NM_001081098]                                                                                                                                                                             | NM_001081098                                               | BC039093         | -1.538        | -3.181 | 6.912  |       |
| A_51_P280043 | Mus musculus DEAD/His (Asp-Glu-Ala-Asp/His) box polypeptide 26B, mRNA (cDNA clone MGC:56742 IMAGE:6466142), complete cds. [BC051161]                                                                                                            | BC051161                                                   | Ddx26b           | -1.538        | -2.383 | 2.464  |       |
| A_51_P210143 | Mus musculus synaptic nuclear envelope 2 (Syme2), mRNA [NM_001005510]                                                                                                                                                                           | NM_001005510                                               | Syme2            | -1.537        | -1.648 | 1.249  |       |
| A_52_P171693 | Mus musculus Dnal1 (Hsp40) homolog, subfamily B member 1 (Dnaib1), mRNA [NM_016808]                                                                                                                                                             | NM_016808                                                  | Dnaib1           | -1.533        | -2.363 | 1.475  |       |
| A_51_P467798 | Mus musculus riban protein (Niban), mRNA [NM_022016]                                                                                                                                                                                            | NM_022016                                                  | Niban            | -1.530        | -3.110 | 1.178  |       |
| A_51_P489285 | Mus musculus cancer susceptibility candidate 5 (Casc5), mRNA [NM_029617]                                                                                                                                                                        | NM_029617                                                  | Casc5            | -1.527        | -1.837 | 2.209  |       |
| A_51_P336822 | Mus musculus 0 day neonate cerebellum cDNA, RIKEN full-length enriched library, clone.C230055H22 product hypothetical Lysine-rich region containing protein, full insert sequence. [AK048766]                                                   | AK048766                                                   | Vps13c           | -1.526        | -3.740 | 1.187  |       |
| A_52_P389478 | Mus musculus RAS11B, member RAS oncogene family (Rab11b), mRNA [NM_008997]                                                                                                                                                                      | NM_008997                                                  | Rab11b           | -1.525        | -1.725 | 1.271  |       |
| A_52_P352967 | Mus musculus SEH1-like (S. cerevisiae), mRNA (cDNA clone MGC:3584697), complete cds. [BC027244]                                                                                                                                                 | BC027244                                                   | Seh1             | -1.521        | -2.866 | 1.479  |       |
| A_51_P108891 | Mus musculus nuclear fragile X mental retardation protein interacting protein 1 (Nufip1), mRNA [NM_013745]                                                                                                                                      | NM_013745                                                  | Nufip1           | -1.521        | -1.500 | 1.494  |       |
| A_52_P348458 | Mus musculus Toll interacting protein (Tolip), mRNA [NM_023784]                                                                                                                                                                                 | NM_023784                                                  | Tolip            | -1.517        | -1.450 | 1.030  |       |
| A_52_P171993 | Mus musculus 11 days embryo whole body cDNA, RIKEN full-length enriched library, clone.2700060P05 product proteasome (prosome, macropain) 26S subunit, non-ATPase, 7, full insert sequence. [AK012463]                                          | AK012463                                                   | Psm27            | -1.516        | -1.664 | 2.897  |       |
| A_51_P378967 | Mus musculus ciliary neurotrophic factor (Cntf), transcript variant 2, mRNA [NM_053007]                                                                                                                                                         | NM_053007                                                  | Cntf             | -1.514        | -2.402 | 1.654  |       |
| A_52_P379531 | Mus musculus timeless homolog (Drosophila) (Timeless), mRNA [NM_011589]                                                                                                                                                                         | NM_011589                                                  | Timeless         | -1.513        | -1.427 | 1.021  |       |
| A_51_P353095 | Mus musculus zinc finger, FYVE domain containing 27 (Zfyve27), mRNA [NM_177319]                                                                                                                                                                 | NM_177319                                                  | Zfyve27          | -1.512        | -1.520 | 1.127  |       |
| A_51_P171197 | Mus musculus poly ribonucleic acid polymerase 2 (Scrap2), mRNA [NM_027352]                                                                                                                                                                      | NM_027352                                                  | Scrap2           | -1.511        | -1.621 | 1.734  |       |
| A_51_P383822 | Mus musculus ecotropic viral integration site 2b (Evi2b), transcript variant 2, mRNA [NM_146023]                                                                                                                                                | NM_146023                                                  | Evi2b            | -1.508        | -1.427 | 1.187  |       |
| A_51_P361359 | Mus musculus asparagine-linked glycosylation 11 homolog (yeast), alpha-1,2-mannosyltransferase (Alg11), mRNA [NM_183142]                                                                                                                        | NM_183142                                                  | Alg11            | -1.508        | -1.635 | 1.128  |       |
| A_52_P678510 | Mus musculus T-cell specific GTPase (Tgtp), mRNA [NM_011579]                                                                                                                                                                                    | NM_011579                                                  | Tgtp             | -1.508        | -1.413 | 1.289  |       |
| A_51_P338515 | Mus musculus tumor necrosis factor superfamily, member 5-nucleated protein 1 (Tnfrsf5p1), mRNA [NM_134138]                                                                                                                                      | NM_134138                                                  | Tnfrsf5p1        | -1.506        | -1.583 | 1.210  |       |
| A_52_P434820 | Mus musculus glucosamine-6-phosphate deaminase 2 (Gnpd2), mRNA [NM_001038015]                                                                                                                                                                   | NM_001038015                                               | Gnpd2a           | -1.504        | -1.665 | 1.473  |       |
| A_51_P443618 | Mus musculus RIKEN cDNA 0610011F06 gene (0610011F06Rik), mRNA [NM_026686]                                                                                                                                                                       | NM_026686                                                  | 0610011F06Rik    | -1.501        | -2.000 | 2.231  |       |
| A_51_P271120 | Mus musculus SEC23B (S. cerevisiae) (Sec23b), mRNA [NM_019787]                                                                                                                                                                                  | NM_019787                                                  | Sec23b           | -1.497        | -2.787 | 2.217  |       |
| A_51_P348456 | Mus musculus RE-1 silencing transcription factor (Rest), mRNA [NM_011263]                                                                                                                                                                       | NM_011263                                                  | Rest             | -1.495        | -1.668 | 1.545  |       |
| A_51_P485542 | Mus musculus cytidine 5'-triphosphate synthase 2 (Ctps2), mRNA [NM_018737]                                                                                                                                                                      | NM_018737                                                  | Ctps2            | -1.495        | -1.464 | 1.020  |       |
| A_52_P28335  | Mus musculus cyclin K (Ccnk), mRNA [NM_009832]                                                                                                                                                                                                  | NM_009832                                                  | Ccnk             | -1.495        | -1.940 | 2.044  |       |
| A_52_P551496 | Mus musculus nuclear factor IIC (NfiC), transcript variant 1, mRNA [NM_009888]                                                                                                                                                                  | NM_009888                                                  | NfiC             | -1.491        | -1.435 | 1.028  |       |
| A_51_P101006 | RIKEN cDNA 1190002A17 gene [Source:MarkerSymbol.Acc.MGI:1916120] [ENSMUST00000047156]                                                                                                                                                           | NM_006688                                                  | 1190002A17Rik    | -1.486        | -1.911 | 1.122  |       |
| A_51_P249414 | Mus musculus expressed sequence 2 embryonic lethal (Es2el), transcript variant 1, mRNA [NM_022408]                                                                                                                                              | NM_022408                                                  | Es2el            | -1.484        | -6.096 | 1.362  |       |
| A_51_P221132 | Mus musculus L-2-hydroxyglutarate dehydrogenase (L2hgdh), mRNA [NM_145443]                                                                                                                                                                      | NM_145443                                                  | L2hgdh           | -1.484        | -1.820 | 1.022  |       |
| A_52_P205027 | Mus musculus form binding protein 1 (Fbpb1), transcript variant 2, mRNA [NM_019406]                                                                                                                                                             | NM_019406                                                  | Fbpb1            | -1.484        | -1.657 | 1.592  |       |
| A_52_P331762 | Mus musculus LIM domain only 1 (Lmo1), mRNA [NM_057173]                                                                                                                                                                                         | NM_057173                                                  | Lmo1             | -1.482        | -1.522 | 1.176  |       |
| A_52_P265877 | Mus musculus aldehyde dehydrogenase 9, subfamily A1 (Aldh9a1), mRNA [NM_019993]                                                                                                                                                                 | NM_019993                                                  | Aldh9a1          | -1.482        | -2.011 | 1.236  |       |
| A_51_P102652 | Mus musculus RIKEN cDNA 1810034K20 gene (1810034K20Rik), mRNA [NM_023397]                                                                                                                                                                       | NM_023397                                                  | 1810034K20Rik    | -1.477        | -1.701 | 2.217  |       |
| A_51_P160202 | Mus musculus N-ethylmaleimide sensitive fusion protein (Nsf), mRNA [NM_008740]                                                                                                                                                                  | NM_008740                                                  | Nsf              | -1.476        | -1.557 | 2.474  |       |
| A_51_P185465 | Mus musculus solute carrier family 29 (nucleoside transporters), member 3 (Slc29a3), mRNA [NM_023596]                                                                                                                                           | NM_023596                                                  | Slc29a3          | -1.476        | -2.145 | 2.681  |       |
| A_51_P200838 | Mus musculus amyloid beta precursor protein binding protein 1 (Appbp1), mRNA [NM_144931]                                                                                                                                                        | NM_144931                                                  | Appbp1           | -1.474        | -1.467 | 1.999  |       |
| A_51_P176522 | Mus musculus mazz matrix protein for transcription factor MAZR, complete cds. [AB292397]                                                                                                                                                        | AB292397                                                   | Pat2             | -1.467        | -3.082 | 8.830  |       |
| A_52_P401783 | Mus musculus 13 days embryo male testis cDNA, RIKEN full-length enriched library, clone.6030470M02 product unclassifiable, full insert sequence. [AK031650]                                                                                     | AK031650                                                   | Rbpd1            | -1.462        | -1.688 | 2.985  |       |
| A_52_P119997 | Mus musculus rhomboid domain containing 1 (Rhbdd1), mRNA [NM_029777]                                                                                                                                                                            | NM_029777                                                  | Rhbdd1           | -1.462        | -1.685 | 2.007  |       |
| A_52_P233578 | Mus musculus RanBP-type and C3HC4-type zinc finger containing 1 (Rbck1), transcript variant 2, mRNA [NM_019705]                                                                                                                                 | NM_019705                                                  | Rbck1            | -1.459        | -2.121 | 1.233  |       |
| A_52_P574527 | Mus musculus zinc finger protein 295 (Zfp295), transcript variant 1, mRNA [NM_175428]                                                                                                                                                           | NM_175428                                                  | Zfp295           | -1.459        | -1.884 | 1.129  |       |
| A_52_P174773 | Mus musculus RIKEN cDNA 290010M23 gene (290010M23Rik), mRNA [NM_026963]                                                                                                                                                                         | NM_026963                                                  | 290010M23Rik     | -1.458        | -1.462 | 1.020  |       |
| A_52_P43869  | Mus musculus transmembrane protein 41B (Tmem41b), mRNA [NM_153525]                                                                                                                                                                              | NM_153525                                                  | Tmem41b          | -1.456        | -1.462 | 2.251  |       |
| A_52_P540434 | Mus musculus protein phosphatase 1, catalytic subunit, gamma isoform (Ppp1cc), mRNA [NM_013636]                                                                                                                                                 | NM_013636                                                  | Ppp1cc           | -1.455        | -1.569 | 1.005  |       |
| A_51_P225592 | Mus musculus tropomyosin 4 (Tpm4), mRNA [NM_001001491]                                                                                                                                                                                          | NM_001001491                                               | Tpm4             | -1.455        | -1.420 | 1.155  |       |
| A_52_P464268 | Mus musculus fractured callus expressed transcript 1 (Fxc1), mRNA [NM_019502]                                                                                                                                                                   | NM_019502                                                  | Fxc1             | -1.454        | -1.793 | 1.441  |       |
| A_51_P281384 | Mus musculus RIKEN cDNA 2410187C16 gene (2410187C16Rik), mRNA [NM_029734]                                                                                                                                                                       | NM_029734                                                  | 2410187C16Rik    | -1.453        | -1.692 | 1.414  |       |
| A_51_P125260 | Mus musculus acetyl-Coenzyme A acyltransferase A acyltransferase 4 (mitochondrial 3-oxoacyl-Coenzyme A thiolase) (Acaa2), mRNA [NM_177470]                                                                                                      | NM_177470                                                  | Acaa2            | -1.453        | -2.240 | 1.185  |       |
| A_52_P568200 | Mus musculus, clone IMAGE:398321, mRNA, partial cds. [BC021831]                                                                                                                                                                                 | BC021831                                                   | BC021831         | -1.451        | -2.162 | 1.945  |       |
| A_51_P257156 | Mus musculus RIKEN cDNA 2600009E05 gene (2600009E05Rik), mRNA [NM_029832]                                                                                                                                                                       | NM_029832                                                  | 2600009E05Rik    | -1.451        | -1.743 | 1.557  |       |
| A_51_P382708 | Mus musculus procollagen, type IV, alpha 4 (Col4a4), mRNA [NM_007735]                                                                                                                                                                           | NM_007735                                                  | Col4a4           | -1.447        | A/P    | 1.249  |       |
| A_51_P446912 | Mus musculus PHD finger protein 13 (Phf13), mRNA [NM_172705]                                                                                                                                                                                    | NM_172705                                                  | Phf13            | -1.446        | -1.502 | 1.101  |       |
| A_52_P69867  | Mus musculus protein phosphatase methylesterase 1 (Ppme1), mRNA [NM_028292]                                                                                                                                                                     | NM_028292                                                  | Ppme1            | -1.445        | -1.949 | 1.934  |       |
| A_52_P37938  | Mus musculus adult male aorta and vein cDNA, RIKEN full-length enriched library, clone.A530087K12 product unclassifiable, full insert sequence. [AK080240]                                                                                      | AK080240                                                   | Gpd2             | -1.437        | -1.647 | 1.104  |       |
| A_51_P400166 | Mus musculus three prime repair exonuclease 1 (Trex1), transcript variant 1, mRNA [NM_011637]                                                                                                                                                   | NM_011637                                                  | Trex1            | -1.437        | -1.715 | 1.109  |       |
| A_51_P509099 | Mus musculus tetraspanin 4 (Tspan4), mRNA [NM_053082]                                                                                                                                                                                           | NM_053082                                                  | Tspan4           | -1.437        | -1.796 | 1.808  |       |
| A_52_P181038 | Mus musculus brain LINCREFINED CELL LINE cDNA, RIKEN full-length enriched library, clone.M5C1011O16 product platelet-activating factor acetylhydrolase, isoform 1b, beta1 subunit, full insert sequence. [AK147309]                             | AK147309                                                   | Palfnb1          | -1.436        | -1.426 | 2.338  |       |
| A_52_P54516  | Mus musculus Brn3 binding protein (Brn3bp), mRNA [NM_029752]                                                                                                                                                                                    | NM_029752                                                  | Brn3bp           | -1.434        | -2.453 | 1.107  |       |
| A_51_P455416 | Mus musculus mitogen-activated protein kinase 12 (Mapk12), mRNA [NM_013871]                                                                                                                                                                     | NM_013871                                                  | Mapk12           | -1.434        | -2.564 | 1.788  |       |
| A_52_P566134 | PREDICTED: Mus musculus isocitrate-mRNA synthetase 2, mitochondrial (Iars2), mRNA [XM_808122]                                                                                                                                                   | XM_808122                                                  | Iars2            | -1.433        | -1.793 | 2.214  |       |
| A_51_P473340 | Source:MarkerSymbol.Acc.MGI:360770A1 member 15 [Source:MarkerSymbol.Acc.MGI:360770A1] [ENSMUST00000036296]                                                                                                                                      | NM_008200                                                  | ENSMUST000036296 | -1.433        | -1.413 | 2.266  |       |
| A_51_P180994 | Mus musculus RIKEN cDNA 3110073H01 gene, mRNA (cDNA clone IMAGE:5043259), with apparent retained intron. [BC025200]                                                                                                                             | BC025200                                                   | 3110073H01Rik    | -1.432        | -1.713 | 2.460  |       |
| A_52_P118970 | Mus musculus adult male ocaum cDNA, RIKEN full-length enriched library, clone.9130206I24 product unclassifiable, full insert sequence. [AK078937]                                                                                               | AK078937                                                   | 9130206I24Rik    | -1.432        | -1.713 | 2.460  |       |
| A_51_P398488 | Mus musculus conserved helix-loop-helix ubiquitous protein (Chuk), mRNA [NM_007700]                                                                                                                                                             | NM_007700                                                  | Chuk             | -1.432        | -1.418 | 1.997  |       |
| A_52_P141953 | Mus musculus RIKEN cDNA 1111009L16 gene (1111009L16Rik), mRNA (cDNA clone MGC:41292 IMAGE:1512335), complete cds. [BC034876]                                                                                                                    | BC034876                                                   | 1111009L16Rik    | -1.432        | -1.798 | 3.616  |       |
| A_52_P25878  | Mus musculus vacuolar protein sorting 4b (yeast) (Vps4b), mRNA [NM_009150]                                                                                                                                                                      | NM_009150                                                  | Vps4b            | -1.430        | -2.006 | 1.038  |       |
| A_51_P270939 | Mus musculus poly SNAP receptor complex member 2 (Gosr2), mRNA [NM_019650]                                                                                                                                                                      | NM_019650                                                  | Gosr2            | -1.425        | -1.939 | 3.228  |       |
| A_52_P501447 | PREDICTED: Mus musculus similar to reduced expression 2, transcript variant 19 (LOC631824), mRNA [XM_919663]                                                                                                                                    | XM_919663                                                  | EG631824         | -1.422        | -1.405 | 1.196  |       |
| A_51_P151086 | Mus musculus ubiquitin specific peptidase 4f (Usp47), mRNA [NM_133758]                                                                                                                                                                          | NM_133758                                                  | Usp47            | -1.421        | -1.315 | 1.058  |       |
| A_52_P603976 | Mus musculus jumping translocation breakpoint (Jtb), mRNA [NM_206924]                                                                                                                                                                           | NM_206924                                                  | Jtb              | -1.417        | -1.892 | 1.223  |       |
| A_52_P558411 | Mus musculus moesin (Man), mRNA [NM_010833]                                                                                                                                                                                                     | NM_010833                                                  | Man              | -1.416        | -1.417 | 1.078  |       |
| A_52_P476929 | Mus musculus RIKEN cDNA 8430427H17 gene (8430427H17Rik), mRNA [NM_001001986]                                                                                                                                                                    | NM_001001986                                               | 8430427H17Rik    | -1.414        | -2.128 | 1.931  |       |
| A_52_P466902 | Mus musculus RIKEN cDNA 903062A02 gene (903062A02Rik), mRNA [NM_027815]                                                                                                                                                                         | NM_027815                                                  | 903062A02Rik     | -1.414        | -2.788 | 2.519  |       |
| A_51_P514139 | Mus musculus PR domain containing 16 (Prdm16), mRNA [NM_027504]                                                                                                                                                                                 | NM_027504                                                  | Prdm16           | -1.410        | -2.919 | 1.834  |       |
| A_52_P142191 | Mus musculus anterior pharynx defective 1b homolog (C. elegans) (Aph1b), mRNA [NM_177583]                                                                                                                                                       | NM_177583                                                  | Aph1b            | -1.408        | -1.825 | 1.410  |       |
| A_51_P502043 | Mus musculus adult male testis cDNA, RIKEN full-length enriched library, clone.4933427G3 product HYPOTHETICAL 21.8 KDA PROTEIN (BRMS2) [SIMILAR TO MITOCHONDRIAL RIBOSOMAL PROTEIN S4] homolog [Homo sapiens], full insert sequence. [AK030236] | AK030236                                                   | 4933427G3Rik     | -1.408        | -1.552 | 1.098  |       |
| A_51_P506250 | Mus musculus mitochondrial ribosomal protein L55 (Mrpl55), mRNA [NM_026035]                                                                                                                                                                     | NM_026035                                                  | Mrpl55           | -1.408        | -3.052 | 1.442  |       |
| A_51_P480779 | Mus musculus 18-day embryo whole body cDNA, RIKEN full-length enriched library, clone.1110033B07 product hypothetical protein, full insert sequence. [AK027953]                                                                                 | AK027953                                                   | Snv4             | -1.407        | -2.339 | 1.481  |       |
| A_51_P246471 | Mus musculus pre-B-cell leukemia transcription factor 2 (Pbx2), mRNA [NM_017463]                                                                                                                                                                | NM_017463                                                  | Pbx2             | -1.406        | -1.786 | 1.510  |       |
| A_51_P125050 | Mus musculus domain 74 (Wdr34), mRNA [NM_134139]                                                                                                                                                                                                | NM_134139                                                  | Wdr34            | -1.404        | -2.846 | 1.467  |       |
| A_51_P431491 | Mus musculus RAB11 family interacting protein 3 (class II), mRNA (cDNA clone IMAGE:4973426), complete cds. [BC037132]                                                                                                                           | BC037132                                                   | Rab11fp3         | -1.404        | -1.792 | 1.604  |       |
| A_51_P144868 | Mus musculus leukocyte receptor cluster (LRC) member 4 (Leng4), mRNA [NM_029934]                                                                                                                                                                | NM_029934                                                  | Leng4            | -1.404        | -1.984 | 1.777  |       |
| A_51_P378777 | Mus musculus RIKEN cDNA 1200013P24 gene (1200013P24Rik), mRNA [NM_020900]                                                                                                                                                                       | NM_020900                                                  | 1200013P24Rik    | -1.403        | -2.492 | 1.650  |       |
| A_51_P396942 | Mus musculus signal transduction protein 2 (Tsp2), mRNA [NM_0111597]                                                                                                                                                                            | NM_0111597                                                 | Tsp2             | -1.402        | -1.400 | 1.386  |       |
| A_51_P317122 | Mus musculus Yip1 domain family, member 5 (Yipf5), mRNA [NM_023311]                                                                                                                                                                             | NM_023311                                                  | Yipf5            | -1.400        | -1.521 | 1.056  |       |
| A_52_P387818 | Mus musculus SEC23B (S. cerevisiae) (Sec23b), mRNA [NM_019787]                                                                                                                                                                                  | NM_019787                                                  | Sec23b           | -1.400        | -3.385 | 1.329  |       |

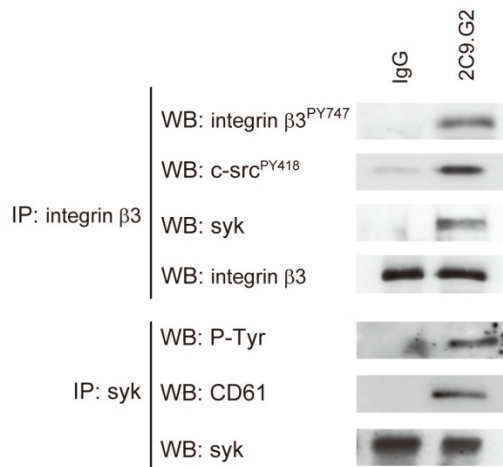

**Figure S1. 2C9.G2 induces phosphorylation of Tyr747 (pY747) of β3 integrin in mouse platelets**

Washed platelets were incubated for 15 min in the presence of 2C9.G2 or IgG, after which cell lysates were prepared. After immunoprecipitation using anti-β3 integrin or anti-Syk antibodies, western blotting was carried out with the indicated antibodies.

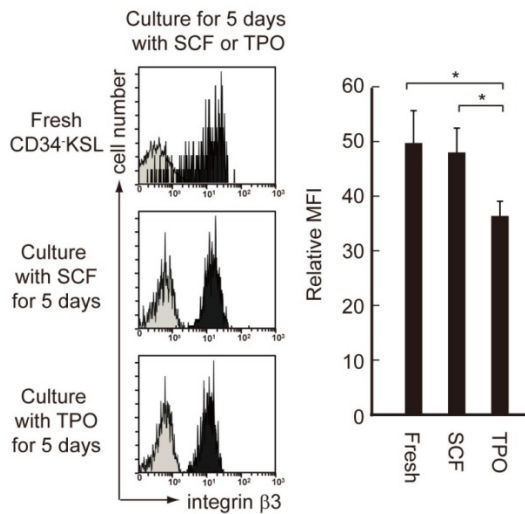

**Figure S2. TPO did not enhanced expression of  $\beta$ 3 integrin on HSCs**

One thousand sorted Wt CD34<sup>-</sup>KSL cells were cultured for 5 days in the presence SCF or TPO. Following the culture, the level of integrin  $\beta$ 3 expression was determined by flow cytometry. “Fresh” indicates uncultured CD34<sup>-</sup>KSL cells. The histograms depict expression of integrin  $\beta$ 3; the graphs depict the relative mean fluorescence intensity (MFI). Data are means  $\pm$  S.D (\*p<0.01).

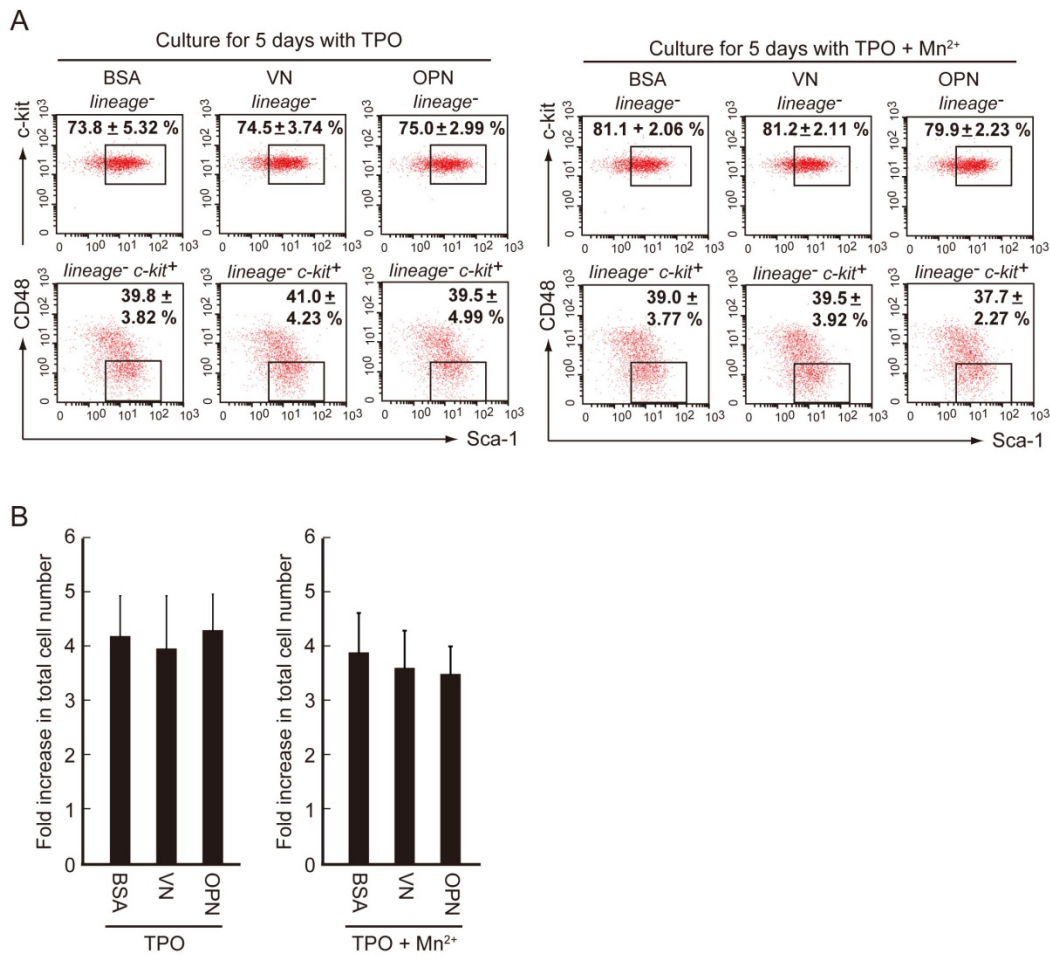

**Figure S3. Natural ligands have little effect on HSC expansion**

One thousand sorted Wt CD34<sup>+</sup>KSL cells were cultured for 5 days on plates coated with the indicated ligand, with or without Mn<sup>2+</sup> in the presence of TPO. (A) The percentages of KSL and CD48<sup>+</sup>KSL cells were determined by flow cytometry after culture. The values in the dot plots are means ± S.D. (B) After the culture, total cell numbers were also counted. The graphs show the fold-increase of total cell number after 5 days of culture. Data are means ± S.D.



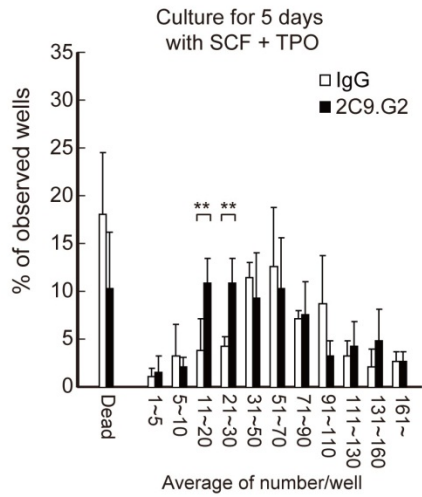

**Figure S4. 2C9.G2 suppresses cell division during *ex vivo* expansion of HSC**

Single CD34<sup>-</sup>KSL cells were cultured with 2C9.G2 or IgG in 96-well plates. The Y-axis shows the % observed wells among the 96 wells in each plate, and the X-axis shows the number of cells derived from the single cells in the individual wells after 5 days of culture. Data are means ± S.D (\*\*p<0.05, \*p<0.01, n=6 of independent experiments).

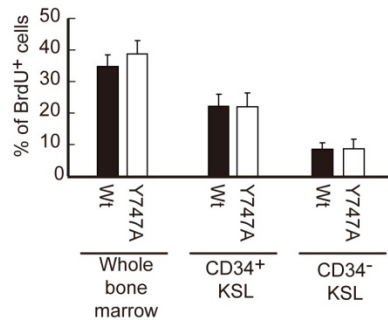

**Figure S5. Y747A mutation has little effect on the cell cycle state of HSCs *in vivo***

The frequency of BrdU<sup>+</sup> cells among BMCs was examined using flow cytometry 2 h after administration of BrdU. The graphs depict the % BrdU<sup>+</sup> cells among the indicated populations. Data are presented as means ± S.D. (\*p<0.01, n>3).
